# Conditional blastocyst complementation of a defective Foxa2 lineage efficiently promotes generation of the whole lung

Akihiro Miura<sup>1,2</sup>, Hemanta Sarmah<sup>1</sup>, Junichi Tanaka<sup>1</sup>, Youngmin Hwang<sup>1</sup>, Anri Sawada,<sup>1</sup> Yuko Shimamura<sup>1</sup>, Yinshan Fang<sup>1</sup>, Dai Shimizu<sup>2</sup>, Zurab Ninish<sup>1</sup>, Jake Le Suer<sup>3,4</sup>, Nicole C. Dubois<sup>5</sup>, Jennifer Davis<sup>6</sup>, Shinichi Toyooka<sup>2</sup>, Jun Wu<sup>7</sup>, Jianwen Que<sup>1</sup>, Finn J. Hawkins<sup>3,4</sup>, Chyuan-Sheng Lin<sup>8</sup>, Munemasa Mori<sup>1</sup> †

1 Columbia Center for Human Development and Division of Pulmonary, Allergy, Critical Care, Department of Medicine, Columbia University Medical Center, New York, NY 10032, USA.

2 Department of Thoracic, Breast and Endocrinological Surgery, Okayama University Graduate School of Medicine, Dentistry and Pharmaceutical Sciences, Okayama, 7008558, Japan.

3 The Pulmonary Center and Department of Medicine, Boston University School of Medicine, Boston, MA 02118, USA

4 Center for Regenerative Medicine, Boston University and Boston Medical Center, Boston, MA 02118, USA

5 Department of Cell, Developmental and Regenerative Biology, Icahn School of Medicine at Mount Sinai, New York, NY 10029, USA.

6 Department of Pathology, University of Washington, Seattle, WA 98109, USA.

7 Department of Molecular Biology, University of Texas Southwestern Medical Center, Dallas, TX, USA

8 Bernard and Shirlee Brown Glaucoma Laboratory, Department of Pathology and Cell Biology, College of Physicians and Surgeons, Columbia University Irving Medical Center, New York, NY 10032, USA.

## † To whom correspondence should be addressed:

Munemasa Mori, M.D., Ph.D.

650W 168<sup>th</sup> St, New York, NY 10032, USA

E-mail: [mm4452@cumc.columbia.edu](mailto:mm4452@cumc.columbia.edu)

## Abstract

Millions suffer from incurable lung diseases, and the donor lung shortage hampers organ transplants. Identifying the crucial lineage and the program for lung organogenesis could facilitate designing whole-lung bioengineering. Using lineage-tracing mice and human iPSC-derived lung-directed differentiation, we revealed that gastrulating Foxa2 lineage contributed to both lung mesenchyme and epithelium formation. Interestingly, Foxa2 lineage-derived cells in the lung mesenchyme progressively increased and occupied more than half of the mesenchyme niche, including endothelial cells, during lung development. Foxa2 promoter-driven, conditional Fgfr2 gene depletion caused the lung agenesis phenotype in mice. Importantly, wild-type donor mouse iPSCs injected into their blastocysts rescued this phenotype by complementing the Fgfr2-defective niche in the lung epithelium and mesenchyme. Donor cell is shown to replace the entire lung epithelial and robust mesenchymal niche during early chimeric lung development, resulting in efficient complementation of the nearly entire lung niche at the late stage of lung development. These results suggest that lung complementation based on the Foxa2 lineage is a unique model for

the progressive mobilization of donor cells into both epithelial and mesenchymal lung niches and provides crucial insights for designing new bioengineering strategies to generate whole lungs.

**KEYWORDS**

**Entire lung generation**

**Conditional blastocyst complementation**

**Lung mesenchyme precursors**

**Mesendoderm**

## INTRODUCTION

Tissue regeneration to treat various intractable diseases has long been challenging (Hackett et al., 2010; Kemter et al., 2020; Ott et al., 2010; Petersen et al., 2010; Wang, 2019). Organ bioengineering strategy based on recellularizing tissue-specific progenitors into the decellularized scaffolds, induced pluripotent stem cell (iPSC)-derived organoids, or 3d-bioprinters are the next-generation tissue transplant therapies (Guyette et al., 2014; Kotton and Morrissey, 2014; Petersen et al., 2010; Tian et al., 2021). Even with these techniques, however, the mammalian lung is one of the most difficult organs to replicate because of its anatomical complexity and cellular diversity. It contains hundreds of airway branches and a thin micron-sized alveolar layer of inflated and well-vascularized alveoli composed of billions of cells from more than 50 different cell types (Crapo et al., 1982; Kotton and Morrissey, 2014; Stone et al., 1992; Travaglini et al., 2020). Donor organs for lung transplantation are in short supply worldwide, but the technology does not exist to generate whole lungs composed of tissue-specific epithelial and mesenchymal cells, including endothelial cells. Lungs grow fully only through natural lung development.

During development, lung epithelial and mesenchymal precursors interact to initiate an elaborate developmental program of organogenesis that includes specification, pattern formation, progenitor cell expansion, and differentiation. The lung epithelial cells are derived from the foregut, definitive endoderm (DE) derivatives, classically labeled by Sox17 and Forkhead Box A2 (Foxa2) (Green et al., 2011; Huang et al., 2014). Multiple genetic studies using Sonic Hedgehog (Shh) Cre lineage-tracing mice have also shown that the entire Nkx2-1+ lung and tracheal epithelial primordium arises from Shh+ DE.

The lung mesenchyme primordium is derived from Wnt2<sup>+</sup> Isl1<sup>+</sup> cardiopulmonary progenitors (CPP). CPP is the derivative of Osr1<sup>+</sup> Nkx6-1<sup>+</sup> Barx1<sup>+</sup> Wnt4<sup>low</sup> foregut lung mesoderm that arises from lateral plate mesoderm (LPM) (Han et al., 2020). While DE and LPM arise from primitive streaks (PS) during gastrulation, the exact lineage origin of LPM has been a complete mystery.

Mesendoderm is a bipotent transitional state between the PS and nascent mesoderm labeled by Mixl1, Pdgfra, and Brachyury (T) during gastrulation that can give rise to both DE and mesoderm (Hart et al., 2002; Tada et al., 2005). Although it was speculated that mesendoderm might form LPM and DE, there have been no conclusive genetic studies on whether mesendoderm gives rise to both lung epithelium and mesenchyme. Pdgfra is expressed in the epiblast-derived mesendoderm, the primitive endoderm (PrE), and its extra-embryonic endoderm derivatives, such as parietal and visceral endoderm, around E5.5~E7.5. Foxa2 plays a pivotal role in alveolarization and airway goblet cell expansion (Wan et al., 2004), while there was a significant knowledge gap regarding Foxa2 lineage during lung development.

Blastocyst complementation (BC) has been proposed as a promising option for tissue-specific niche complementation (Chen et al., 1993). This unique technology has been further developed into intra- and interspecies organ generations such as kidney, pancreas, and blood vessels (Hamanaka et al., 2018; Kobayashi et al., 2010; Usui et al., 2012; Yamaguchi et al., 2017). However, the production of entire organs, including tissue-specific epithelium and mesenchyme, including endothelium, was still difficult because endothelium significantly impacts the other organs. Unfortunately, even with BC, the lungs produced were non-functional and very inefficient, and in addition, the chimeric lungs contained a substantial amount of host-derived tissue (Kitahara

et al., 2020; Li et al., 2021; Wen et al., 2021). Previously, we established the conditional blastocyst complementation (CBC) approach, which targets specific lineages complemented by donor pluripotent stem cells (Mori et al., 2019). Using lineage-specific drivers of lung endoderm in CBCs avoids the effects of genetic manipulation in non-target organs for the generation of empty organ niches that lead to functional chimeric lung generation (Mori et al., 2019). However, most of the lung mesenchyme and endothelium were still derived mainly from the host cells, which was the severe limitation of CBC (Mori et al., 2019). Given that the CBC approach targeted endodermal lungs, we speculated that this limitation was due to a significant gap in our knowledge of the origin of all lung cell types, especially pulmonary mesenchyme, including endothelium. In particular, the complementation of endothelium is a critical issue for overcoming hyperacute rejection after lung transplantation. To overcome this critical issue, we explored the origin and the program of whole lung epithelium and mesenchyme, the major components of the lung.

We hypothesized that targeting a single bona fide lung generative lineage (BFL) may facilitate the designing of the entire lung generation. BFL is based on the strategy for vacating the desired niche by lineage-specific gene depletion to be complemented by donor cells after injecting them into the host blastocysts. The lineage is not necessarily lung-specific but rather based on emptying or mitotically defective in the desired lineage by gene depletion.

We found that the *Foxa2* lineage functions as a BFL in CBC. Although the *Foxa2* lineage did not label the entire lung cells during lung development, the mitotically-defective *Foxa2* lineage promoted efficient whole-lung complementation by donor cells.

## RESULTS

### ***Pdgfra*<sup>+</sup> lineage during gastrulation gives rise to the entire lung mesenchyme.**

To determine the origin of LPM and pulmonary endothelium for the whole lung generation via BFL, we performed lung mesenchyme precursor lineage-tracing analysis using *Pdgfra*<sup>CreERT2/+</sup>; *Rosa*<sup>tdTomato/+</sup> mice. Surprisingly, tamoxifen injection at E5.5 labeled the entire lung mesenchyme with tdTomato at E14.5 (Figures 1A and 1B). This result suggested that the origin of the whole lung mesenchyme is the *Pdgfra* lineage around early-to-mid-streak-stage embryos. tdTomato labeled the entire pulmonary mesenchyme, including Sma<sup>+</sup> airway smooth muscle cells, *Pdgfrβ*<sup>+</sup> pulmonary mesenchyme, and VE-cadherin<sup>+</sup> vascular endothelial cells (Figure 1B). In addition, the *Pdgfra* lineage only partially labels the lung epithelium (Figure 1B, arrows), suggesting that the contribution of the *Pdgfra* lineage to the lung endoderm is low. It suggests that *Pdgfra* is difficult to define as a BFL because of its low contribution to the lung epithelium.

### ***Foxa2* lineage labels *Pdgfra*<sup>+</sup> mesendoderm niche during mouse development**

Single-cell RNA-seq (scRNA-seq) analysis using *Foxa2*-Venus fusion protein reporter mice indicated that the *Foxa2* lineage might give rise to LPM and DE (Scheibner et al., 2021). Given that *Foxa2* and *Pdgfra* are expressed during the conversion from mesendoderm to mesenchyme (Artus et al., 2010; Kopper and Benvenisty, 2012; Scheibner et al., 2021; Tada et al., 2005), we used *Foxa2*-lineage tracing mice (*Foxa2*<sup>Cre/+</sup>; *Rosa*<sup>tdTomato/+</sup>) (Horn et al., 2012) to determine whether the *Foxa2*-lineage would label Mixl1<sup>+</sup> or *Pdgfra*<sup>+</sup> mesendoderm around E6.25~7.0 during gastrulation. Notably, *Foxa2*-lineage-driven tdTomato labels a part of the *Pdgfra*<sup>+</sup> mesendoderm of the primitive streak (PS) around E6.25~E6.5 relatively early-streak-stage embryos (Figure 1C, arrow). In the E6.5~E7.0 mid-to-late-streak-stage PS region (Figure 1D, dotted lines), *Foxa2*-lineage-derived tdTomato were found in the PS and *Pdgfra*<sup>+</sup> adjacent nascent mesoderm, suggesting that *Foxa2* lineage-labeled *Pdgfra*<sup>+</sup> cells ingresses from PS to nascent



mesoderm regions (Figure 1D, arrowheads). These data are reminiscent of the definition of mesendoderm (Hart et al., 2002; Tada et al., 2005). Our result indicates that the *Foxa2* lineage-labeled *Pdgfr $\alpha$* <sup>+</sup> cells are the mesendoderm, most likely the derivative of posterior epiblasts, since *Foxa2* is expressed only in the posterior epiblasts before gastrulation (Scheibner et al., 2021). Further immunostaining analysis of the sequential sections of mid-streak-stage E6.5~6.75 embryos confirmed that the *Foxa2* lineage appeared in the distal portion of *Mixl1*-weakly-positive mesendoderm (Figures 1E and 1F, arrows) at anterior primitive streak (APS) besides the *Foxa2* protein-expressing DE (Figures 1E and 1F, arrowheads). Based on our *Pdgfr $\alpha$* <sup>+</sup> lineage tracing data, we further examined whether *Foxa2*-lineage would label lung mesenchyme.

### ***Foxa2*-lineage labeling increased during lung development, leading to occupy the entire lung epithelium and half of the lung mesenchyme, including lung endothelium**

*Foxa2*-lineage tracing mice (*Foxa2*<sup>Cre/+</sup>; *Rosa*<sup>tdTomato/+</sup>) faithfully target *Nkx2-5*<sup>+</sup> cardiac progenitors associated with the origin of *Wnt2*<sup>+</sup> *Isl1*<sup>+</sup> CPP (Bardot et al., 2017; Peng et al., 2013) lung mesenchyme. However, there was no conclusive evidence of whether *Foxa2*-lineage can give rise to *Wnt2*<sup>+</sup> *Isl1*<sup>+</sup> CPP (Bardot et al., 2017; Peng et al., 2013). Using the *Foxa2*-lineage tracing mice, we found from immunostaining that *Foxa2* lineage labeling occupies the entire lung epithelium and most of the lung mesenchyme at E16.5 (Figures 2A-C). Quantitative analyses by flow cytometry in the E14.5 developing lungs of *Foxa2*-lineage tracing mice showed that *Foxa2*-lineage labeled almost the entire lung epithelium (89.6% $\pm$  1.80) and the partial lung mesenchyme (24.1% $\pm$  5.31), including endothelial cells (18.3 % $\pm$  8.05) (Figure 2D). Contrary to expectations, *Foxa2*-lineage labeled cells increased dramatically throughout lung development (Figure 2E). In adulthood, the *Foxa2*-lineage labeling reached about 98.98% $\pm$  0.171 in lung epithelium, 45.43% $\pm$  7.30 in lung mesenchyme, and 61.48% $\pm$  9.49 in lung vascular endothelial cells, with more than two-fold change in the lung endothelium, compared with E14.5 (Figure 2E). Morphometric analysis of immunostaining further confirmed that *Foxa2* lineage marked about 30% of E14.5 multiple cell types of lung mesenchyme: *Sma*<sup>+</sup> smooth muscle cells (24.9% $\pm$  8.50), VE-cadherin<sup>+</sup> (39.3% $\pm$  12.5) or *Pecam1*<sup>+</sup> (36.6% $\pm$  11.1) endothelial cells, and *Pdgfr $\beta$* <sup>+</sup> pericytes of the pulmonary arteries and pulmonary veins (41.4% $\pm$  10.5) (Figures 1F and 1G). Interestingly, no clear *Foxa2* protein level expression was observed in the mesenchyme of the embryonic lungs (Figure S1A), consistent with previously reported *Foxa2* protein expression patterns (Wan et al., 2004). However, the LungMAP deposited single-cell RNA-seq database analysis showed a sporadic *Foxa2* transcriptional expression pattern in developing lung mesenchyme, particularly in proliferating endothelium, on E15.5 and E17.5 (Figure S1B). We confirmed *Foxa2* transcriptional expression in lung mesenchyme by in situ hybridization analysis on E18.5 (Figure S1C and S1D). The expression was detected mostly in tdTomato positive but low frequency in the negative cells, which indicates that lung mesenchyme spontaneously expressed *Foxa2* at a transcriptional level and turn on tdTomato during lung development. We also sorted the cell fraction of CD45<sup>-</sup> CD31<sup>-</sup> EPCAM<sup>-</sup> tdTomato<sup>+</sup> and CD45<sup>-</sup> CD31<sup>-</sup> EPCAM<sup>-</sup> tdTomato<sup>-</sup> from developing lung mesenchyme at E18.5. We observed a slight increase in the relative expression of *Foxa2* in the tdTomato<sup>+</sup> fraction of embryonic lung mesenchyme, which most likely contributed to the labeling in the *Foxa2*-lineage tracing mice (Figure S1E). These results suggest pulmonary mesenchymal progenitor cells turned on *Foxa2* expression slightly at the mRNA level rather than the protein level, which led to a gradual increase in *Foxa2* lineage labeling. Furthermore, tdTomato<sup>+</sup> endothelial cells were found to have a slightly higher proliferative capacity than tdTomato<sup>-</sup> cells (Figure S1F). These results suggest that *Foxa2* lineage<sup>+</sup> pulmonary mesenchymal appeared during lung development, and lineage

labeling gradually increased compared to *Foxa2*<sup>-</sup> lung mesenchyme progenitors throughout lung development.

### **Co-development of endodermal and mesodermal lung progenitors derived from MIXL1<sup>+</sup> PDGFR $\alpha$ + FOXA2<sup>+</sup> mesendoderm in the directed differentiation protocol using hiPSC**

To determine whether *Foxa2* or *Pdgfra* mesoderm is an evolutionarily well-conserved niche that can give rise to both pulmonary endoderm and mesoderm, we modified a previously reported protocol to establish a pulmonary endoderm-mesoderm co-developmentally directed differentiation protocol (Chen et al., 2017; Gotoh et al., 2014; Hawkins et al., 2017; Huang et al., 2014; Konishi et al., 2016) (Figure 3A). With this optimized protocol, various hiPSC lines were found to efficiently induce a lung bud-like appearance, indicated by NKX2-1<sup>+</sup>, in lung epithelial cells (Gotoh et al., 2014; Konishi et al., 2016). We found that on day 10, TBX4<sup>+</sup> lung mesenchyme emerged and surrounded the NKX2-1<sup>+</sup>SOX9<sup>+</sup> lung epithelium (Figure 3B and 3C). The qPCR kinetics analyses across the time point further supported the appearance of lung mesenchyme, represented by LPM marker expression peaked on day6~8; *OSR1*, *FGF10*, *BMP4*, *PDGFR $\alpha$* , and smooth muscle cell markers peaked on day8~10; *ACTA2* and *PDGFR $\beta$* , and CPP markers peaked on day8~12; *ISL1*, *WNT2*, *FOXF1*, and *TBX4*, peaked on days 10~14 simultaneously with pulmonary epithelial markers, *NKX2-1* and *CPM* (Figure 3D).

In this differentiation protocol, NKX2-1<sup>+</sup> lung endoderm and WNT2+TBX4<sup>+</sup> lung mesoderm were derived from the anteroventral endoderm and mesoderm at day 15 after Activin-mediated definitive endoderm and LPM induction, respectively (Chen et al., 2017; Huang et al., 2014). During primordial streak induction from day0 to day3, cell surface markers of PDGFR $\alpha$  and EPCAM and intracellular FOXA2 and MIXL1 kinetics were analyzed by flow cytometry every 12 hours (Figure 3E). Briefly, 12 hours after the Activin induction, more than 60% of the EPCAM<sup>+</sup>PDGFR $\alpha$ <sup>-</sup> primitive streak first turned on MIXL1, the mesendoderm marker (Hart et al., 2002; Tada et al., 2005). Subsequently, the epithelial-mesenchymal transition occurred 24 hours later, as represented by the PDGFR $\alpha$  induction in EPCAM<sup>+</sup>MIXL1<sup>+</sup> mesendoderm. After 36 hours, more than 90% of MIXL1+EPCAM<sup>+</sup> mesoderm cells expressed PDGFR $\alpha$ . At the same time, expression of FOXA2 appeared in some of those mesoderm cells (Figures 3E and 3F). Thereafter, PDGFR $\alpha$  expression decreased, and 72 hours later, mutual FOXA2 induction appeared when EPCAM<sup>+</sup>FOXA2<sup>+</sup> DE and EPCAM<sup>-</sup>FOXA2<sup>-</sup> LPM were presented (Figure 3G). The dynamics of MIXL1, PDGFR $\alpha$ , and FOXA2 were further revealed by qPCR analysis (Figure 3H). These results suggest that PDGFR $\alpha$ <sup>+</sup> and FOXA2<sup>+</sup> lineage are redundant but distinct stages of mesoderm development. It can give rise to both endoderm and mesoderm lung cells conserved in mouse development and human-directed differentiation (Figure S4A).

### **Foxa2-driven Fgfr2 conditional knockout showed a lung agenesis phenotype**

The evolutionary-conserved *Foxa2*-lineage<sup>+</sup> mesendoderm forms endodermal and mesodermal lung niches, suggesting that it may function as a BFL to generate the entire lungs after donor cells are injected into the vacant niche in the *Foxa2* lineage. To explore this possibility, CBC was performed using *Foxa2*-driven *Fgfr2*-conditional knockout mice (*Foxa2*<sup>Cre/+</sup>; *Fgfr2*<sup>flox/flox</sup>, hereafter, *Foxa2*<sup>Cre/+</sup>; *Fgfr2*<sup>cnul</sup>). Mitotic signaling via *Fgfr2* is required for both lung epithelium and mesenchyme, and systemic knockout mice of *Fgf10* or *Fgfr2* exhibit a phenotype of lung agenesis (Arman et al., 1999; De Langhe et al., 2006; De Moerloose et al., 2000; Sekine et al., 1999). Based on the results of *Foxa2* lineage tracking and the need for *Fgfr2* signaling, it was

predicted that *Foxa2*<sup>Crel/+</sup>; *Fgfr2*<sup>cnul</sup> mice would be used to generate vacant niches in both lung epithelium and mesenchyme. Indeed, they exhibited a lung agenesis phenotype (Figures S2A-S2C). However, we did not observe agenesis phenotype in other major internal organs related to the *Fgfr2* systemic knockout phenotype (Figure S2D) (Arman et al., 1999; De Langhe et al., 2006; De Moerloose et al., 2000; Sekine et al., 1999).

### Generation of the entire lungs in *Foxa2*-driven *Fgfr2*-deficient mice via CBC

To examine whether donor cells complement the lung agenesis phenotype, we generated nGFP<sup>+</sup>iPSCs from Rosa<sup>nT-nG</sup> mice (hereafter, nGFP<sup>+</sup>iPSCs) via Sendai virus-mediated reprogramming (Huang et al., 2014). nGFP<sup>+</sup>iPSCs were injected into mouse blastocysts (Figure 4A), and chimerism was analyzed at E17.5. Strikingly, donor nGFP<sup>+</sup>iPSCs generated whole lungs in *Foxa2*<sup>Crel/+</sup>; *Fgfr2*<sup>cnul</sup> mice, but general chimerism in other organs were diverse (Figure 4B, S3A, and Table 1). Importantly, almost the entire lung epithelial, mesenchymal, and endothelial cell population at E17.5 was composed exclusively of nGFP<sup>+</sup>iPSCs (Figures 4C and S3B). In contrast, wild-type, *Shh*-driven heterozygous, or knockout mice showed about 50-70% chimerism in the mesenchymal and endothelial lineages of the lung (Figures 4C and 4D). Interestingly, although tdTomato<sup>+</sup> *Fgfr2* knockout mesenchymal cells remained in early lung development at E14.5 (Figure S3C and Table 2), the percentage of Ki67<sup>+</sup> proliferating cells was significantly higher in GFP<sup>+</sup> donor cells compared to tdTomato<sup>+</sup> host cells (Figures 4E – 4G). These results suggest that generating an *Fgfr2* deficient niche in the host *Foxa2* lineage-derived lung mesenchyme is efficient for donor iPSCs recruitment in the defective *Foxa2* lineage mesenchyme niches.

## DISCUSSION

The presence of committed organ precursors capable of contributing to multi-embryonic layers after pluripotent epiblast formation has been assumed, but the identity and origin of the lung precursors needed to be better defined. Although the *Foxa2* lineage could not give rise to the entire lung cells that served as a BFL, we have identified a *Foxa2* lineage that provides a significant stepping stone for facilitating whole lung generation during mouse development. Since donor cells formed about 50~80% chimerism in the complemented lung mesenchyme niches at E14.5 (Table 1) and endogenous *Foxa2* lineage forms only 20%~30% in the lung mesenchyme at E14.5, *Fgfr2* defects at the *Foxa2* lineage in early lung development are important but not sufficient for the complete lung mesenchyme niche complementation. We showed that losing *Fgfr2* expression in *Foxa2* lineage cells resulted in lower proliferative ability than donor cells during the lung complementation (Figure 4F).

Lung epithelial cell precursors were well-known to be *Shh*<sup>+</sup> DE in the lung development field (Cardoso and Kotton, 2008; Christodoulou et al., 2011; Harris et al., 2006; Kadzik and Morrissey, 2012; Tian et al., 2011; Weaver et al., 1999; Xing et al., 2008), and indeed, the *Shh*-lineage traces putative DE-derived epithelial lineage but little lung mesenchyme (Figure S3D). Targeting the endodermal lung lineage driven by *Shh* was sufficient for lung epithelial complementation but insufficient to generate whole lungs, and host-derived cells remained substantially in the mesodermal lung component (Mori et al., 2019).

In contrast to lung epithelium precursors, the orderly commitment and the origin of the entire pulmonary mesenchyme were not defined well. We showed that gastrulating *Pdgfra*-lineage is the origin of the entire lung mesoderm, including endothelium (Figures 1A and 1B) (Mori et al., 2019). Furthermore, *Foxa2* or *Pdgfra* lineage labels a population primarily comprised of the earliest specified precursors in the *Mixl1*<sup>+</sup> mesendoderm niche, which can be identified in vivo and

in human iPSC cell-derived directed differentiation protocol. Our findings, summarized in Figure S4, pinpoint the lineage hierarchy of specified lung precursors in gastrulating mesendoderm, further supported by the scRNA-seq analysis in early embryonic development (Pijuan-Sala et al., 2019) (Figure S4B).

As previously indicated that nascent mesoderm differentiation into a CPP fate (Bardot et al., 2017; Devine et al., 2014; Ng et al., 2022; Peng et al., 2013), we clarified the orderly mesendoderm progression of gene expression, *Mixl1*, *Pdgfra*, and *Foxa2*, and lung progenitor-related markers that parallels the commitment of *Foxa2*<sup>+</sup> *Pdgfra*<sup>+</sup> mesendoderm to an LPM and DE fate in the lung directed differentiation protocol using human iPSC (Figure S4). Our lineage tracing analysis also highlighted the unanticipated *Foxa2* lineage program, the progressive increase of lineage labeling by spontaneous expression of *Foxa2* mRNA that occupies more than half of the lung mesenchyme during lung development. *Foxa2*-lineage<sup>+</sup> lung mesenchyme is a part of *Pdgfra* lineage<sup>+</sup> cells, potentially providing a unique competitive developmental niche during lung development. Further analyses using *Foxa2*CreERT2 lineage tracing mice are required to clarify it. Intriguingly, the *Foxa2* lineage<sup>+</sup> mesenchyme did not show any discrete fates that would predict anatomical localization—depleting *Fgfr2* in the *Foxa2* lineage results in the loss of the *Fgfr2* mitogen-mediated function of *Foxa2* lineage<sup>+</sup> lung mesenchyme, which leads to the loss of proliferative ability in most host lung mesenchyme. The *Foxa2* lineage labeling in lung mesenchyme is around 20% at E14.5 (Figure. 2D and 2E). Moreover, the donor cell complementation in lung mesenchyme at E14.5 still holds host-derived lung mesenchyme but decreases at E17.5. These results indicate that the defective *Foxa2* lineage is critically important for efficient lung complementation.

An unambiguous proof of the developmental origins of patterned organs is critical for developing regenerative strategies and a better understanding of the genes responsible for congenital malformations. For the future development of whole lung generation via CBC using human iPSCs, the human-derived developmental program modification to match the host animals is the key. More broadly, our studies offer a new paradigm that can apply to modeling various congenital lung diseases and future autologous transplantation therapies using iPSC in the near future.

## Acknowledgments

We thank Zurab Ninish for his technical assistance. We sincerely appreciate the generous support from Dr. Hiromitsu Nakauchi at Stanford University and the considerate support and scientific input from Dr. Wellington Cardoso at the Columbia Center for Human Development (CCHD) and the members of Cardoso's lab and CCHD. We acknowledge the support from the CCHD Medicine Microscopy core (MMC), Columbia Stem Cell Initiative (CSCI) Flow Cytometry core (SONY MA900), and Genetically Modified Mouse Model Shared Resource (GMMMSR) for blastocyst injection. This work was funded by NIH-NHLBI 1R01 HL148223-01, DoD PR190557, PR191133 to M. M., JSPS202080340, and The Uehara Memorial Foundation to A. M.

## Author contributions

A.M. and M.M. designed all experiments; Z.N. and A.M. maintained mutant mice for the injection; C.S.L. performed blastocyst injection and embryo transfer; J.T., A.S., Y.S., Y.H., H.S., supported lineage-tracing, chimera analyses, and genotyping; H.S., D.S., and S. T. helped to generate mouse and human iPSCs, J.S. and F.H. kept human iPSC-directed differentiation, N.D. provided

Foxa2<sup>Cre/+</sup> mice, A.M. and M.M. wrote the paper; Y.H., H.S., J.W., J.Q., and F.H. gave crucial insights on the experiments and the manuscripts. There is no competing financial interest.

### **Declaration of interests**

The authors declare no competing interests.



# FIGURES

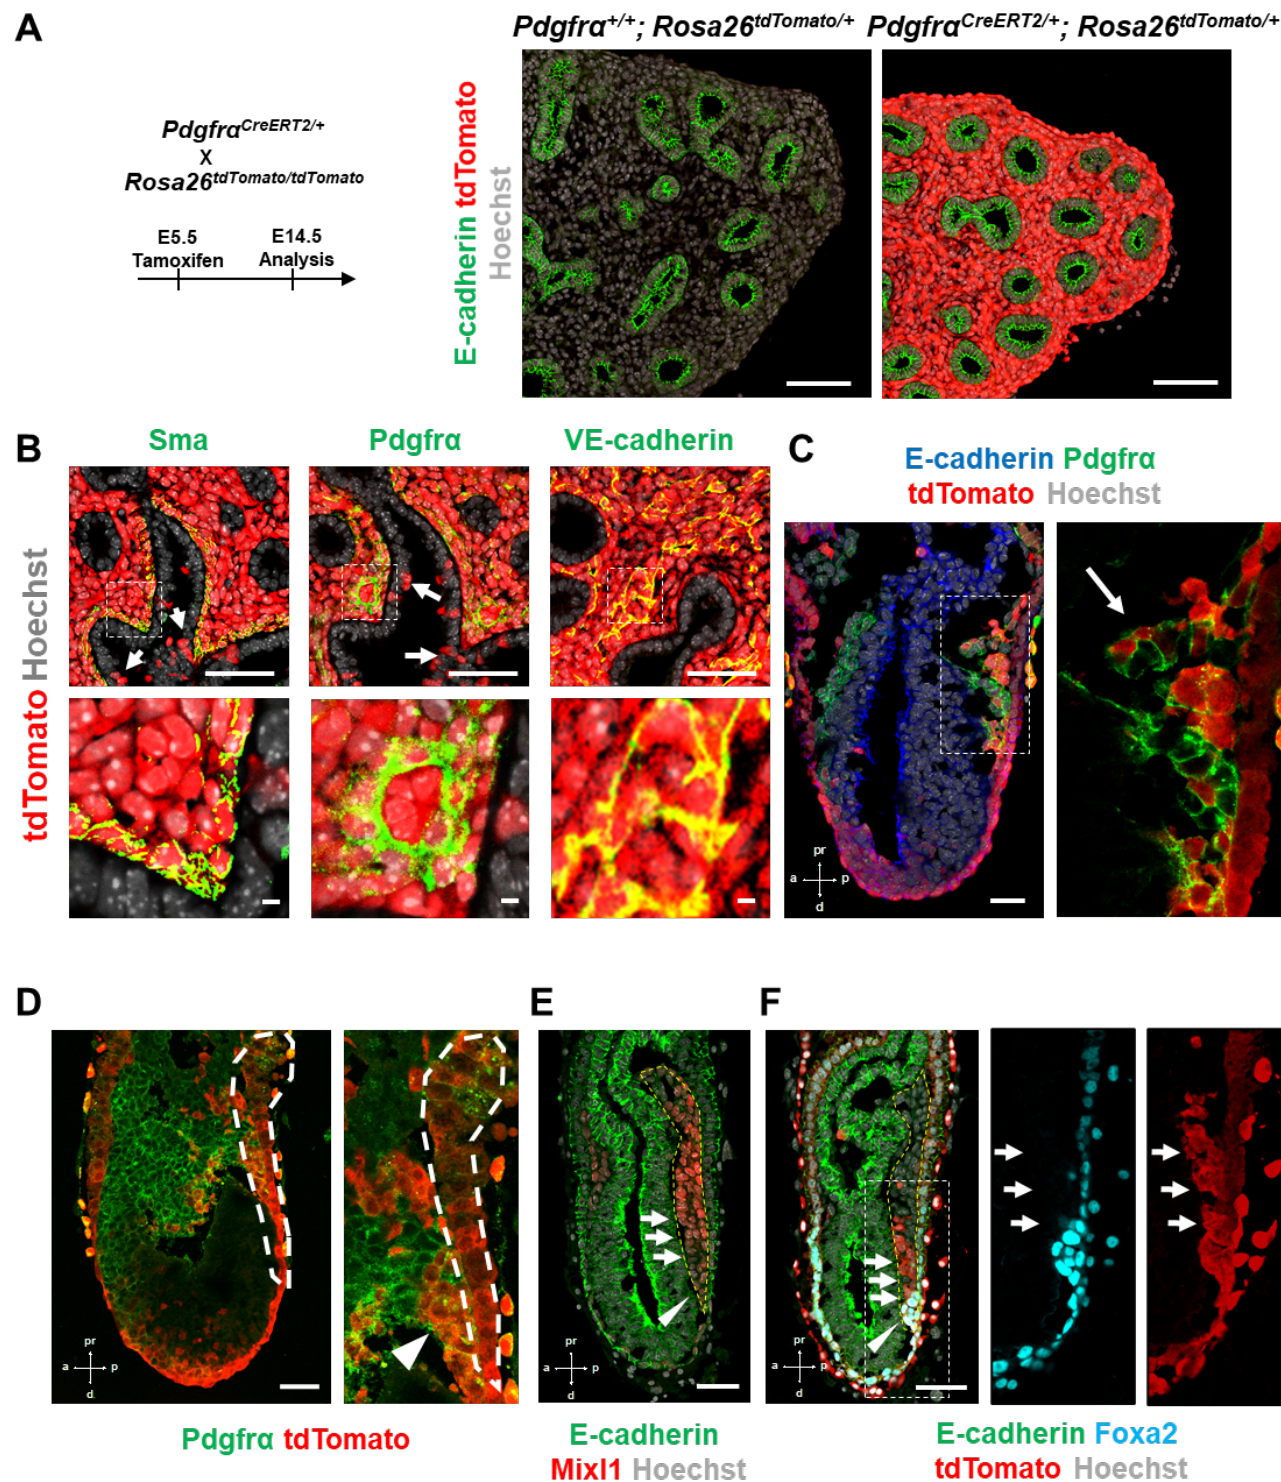



**Figure 1. *Pdgfra* lineage during gastrulation is the origin of the entire pulmonary mesenchyme.** (A) Left: Schematic of Tamoxifen administration (A-B). Representative Immunofluorescence (IF)-confocal imaging of E14.5 *Pdgfra*<sup>CreERT2/+</sup>; *Rosa26*<sup>tdTomato/+</sup> lineage tracing mouse lungs (A, B). Tamoxifen administration at E5.5 labels *Pdgfra*-lineage-driven tdTomato (red) in the entire lung mesenchyme (A), including Sma<sup>+</sup> airway smooth muscle cells, *Pdgfra*<sup>+</sup> mesenchyme, and VE-cadherin<sup>+</sup> capillaries (B). *Pdgfra*-lineage also labeled a low proportion of epithelial cells (B, white arrows). Enlarged box: dotted box. Cre<sup>-</sup> littermate control (A, middle panel) (*n* = 3 per group). Scale bars: A, B = 100, 500μm. (C-F) Representative IF-confocal imaging of E6.25 (C), E7.0 (D), and E6.5 (E, F) from *Foxa2*<sup>Cre/+</sup>; *Rosa26*<sup>tdTomato/+</sup> mice. E-cadherin indicates epiblasts (C-F): (C) *Foxa2*-lineage (red) labeled *Pdgfra* (green) expressing mesendoderm (arrow). (D) *Foxa2*-lineage labeled *Pdgfra*<sup>+</sup> cells and ingresses from primitive streak (PS) (dotted lines) to nascent mesoderm regions (arrowhead). (E) *Mixl1* (red) expression in PS (yellow dotted area). (F) Sequential section of E: Enlarged box: *Foxa2*-lineage (red) marked the distal portion of the arteriolarizing PS that is a part of the *Mixl1*<sup>dim+</sup> mesendoderm (E-F, arrowheads). (*n* = 3 per group). Scale bars = 50μm.

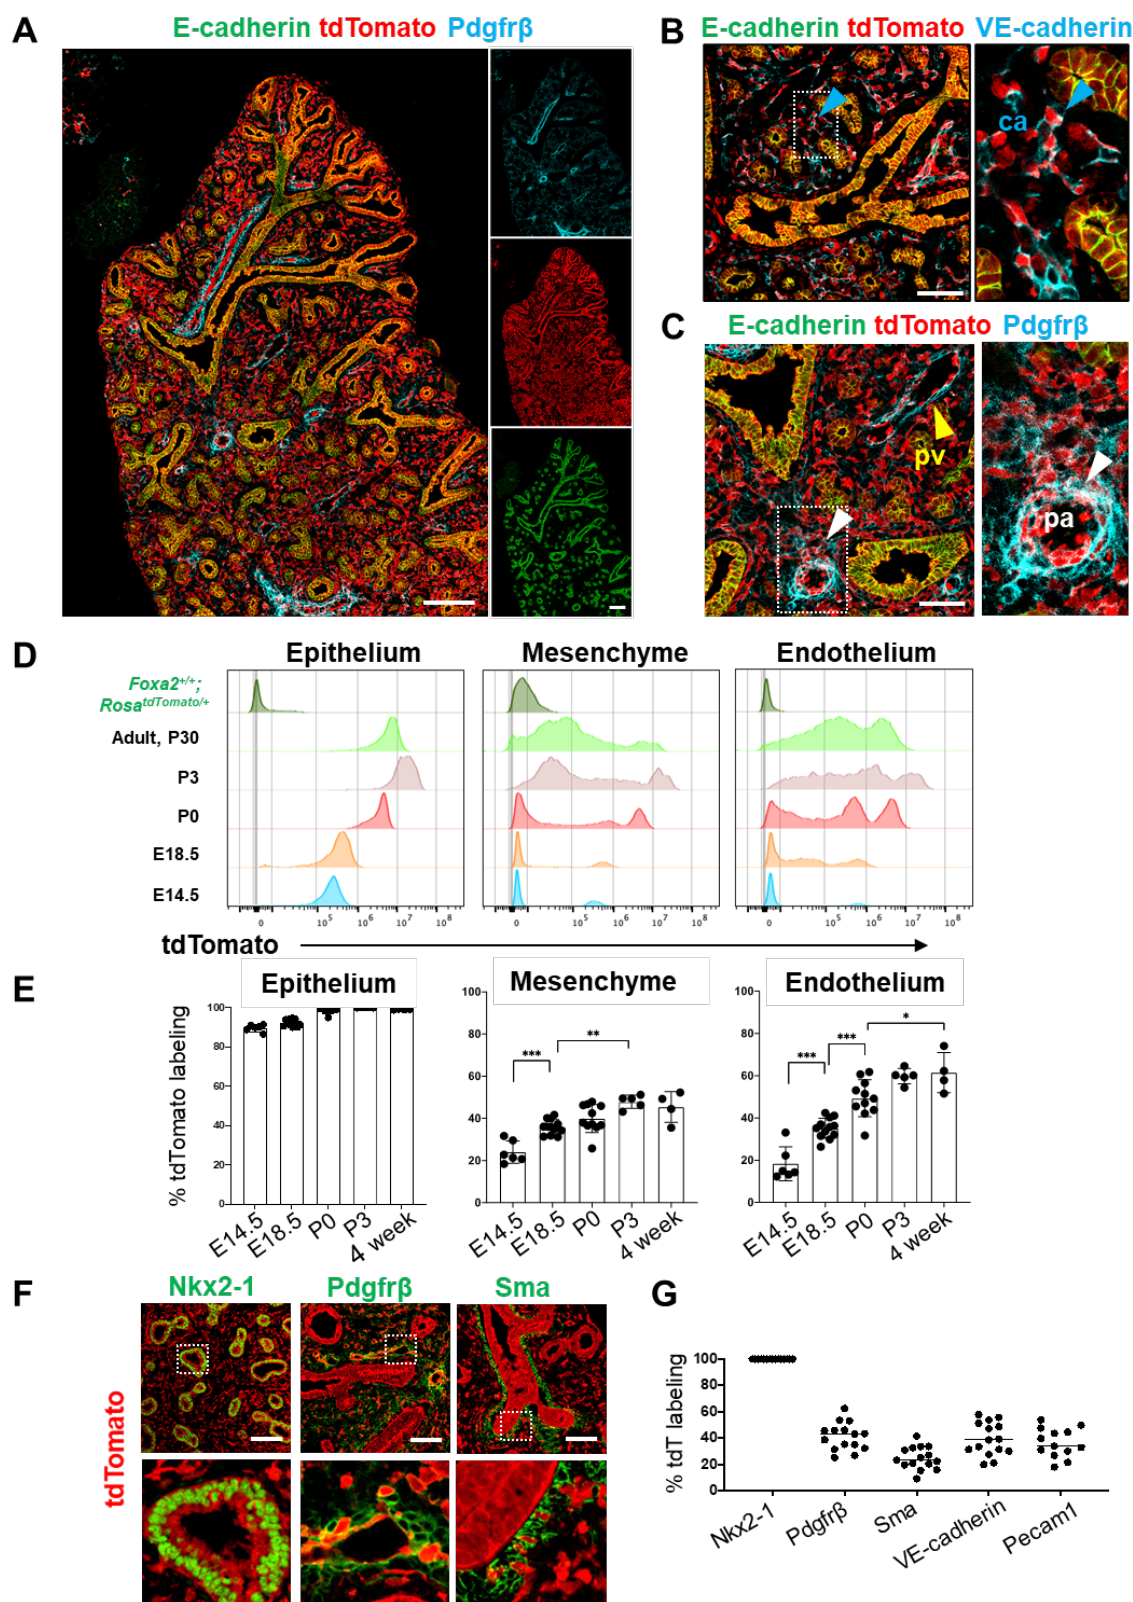

**Figure 2. Foxa2-lineage gradually increased during lung development and labeled the entire lung epithelium and half of the mesenchyme.** (A-C) IF-confocal imaging of E16.5 *Foxa2*<sup>Cre/+</sup>; *Rosa*<sup>tdTomato/+</sup> embryonic lung: (A) Foxa2-lineage (red) labeled E-cadherin<sup>+</sup> lung epithelium (green) entirely and Pdgfrβ<sup>+</sup> mesenchyme (cyan) partially. (B) Foxa2-lineage partially labeled VE-cadherin<sup>+</sup> capillary (ca) (enlarged box, blue arrowhead). (C) Foxa2-lineage labeled Pdgfrβ<sup>+</sup> smooth muscle cells of the pulmonary artery (pa) (enlarged box, white arrowhead) and pulmonary vein (pv, yellow arrowhead). Scale bars (A), (B), and (C) = 200μm, 100μm, and 100μm, respectively. (D and E) Representative histograms and the graphs of FCM quantitative analyses for CD31<sup>+</sup>Epcam<sup>+</sup> lung epithelium, CD31<sup>+</sup>Epcam<sup>-</sup> mesenchyme, and CD31<sup>+</sup>Epcam<sup>-</sup> endothelium at E14.5, E18.5, P0, P3, and four weeks adult (n = 6, 12, 7, 5 and 4, independent biological replicates, respectively) of *Foxa2*<sup>Cre/+</sup>; *Rosa*<sup>tdTomato/+</sup> mouse lungs. The gradual increase of % tdTomato<sup>+</sup> lineage labeling in both lung mesenchyme and endothelium. Statistical analysis: one-way ANOVA with the Tukey post hoc test.; statistically significant if \**P* < 0.05, \*\**P* < 0.01 \*\*\**P* < 0.001, ns: non-significant. (F-G) IF-confocal imaging of E14.5 *Foxa2*<sup>Cre/+</sup>; *Rosa*<sup>tdTomato/+</sup> embryonic lungs. tdTomato labeled entirely with lung epithelial markers Nkx2-1(left) but a relatively low proportion of mesenchyme (Pdgfrβ: middle, and Sma: right). (n = 3 per group). Scale bars = 50μm. Graphs in (G): The morphometric analysis: % of Foxa2-lineage labeling in Nkx2-1<sup>+</sup>epithelial, Pdgfrβ<sup>+</sup>mesenchyme, Sma<sup>+</sup>airway smooth muscle, VE-Cadherin<sup>+</sup> capillaries, or PECAM1<sup>+</sup> arteries from E14.5 *Foxa2*<sup>Cre/+</sup>; *Rosa*<sup>tdTomato/+</sup> lungs. (n = 3 per biological replicates, 5 fields per group).

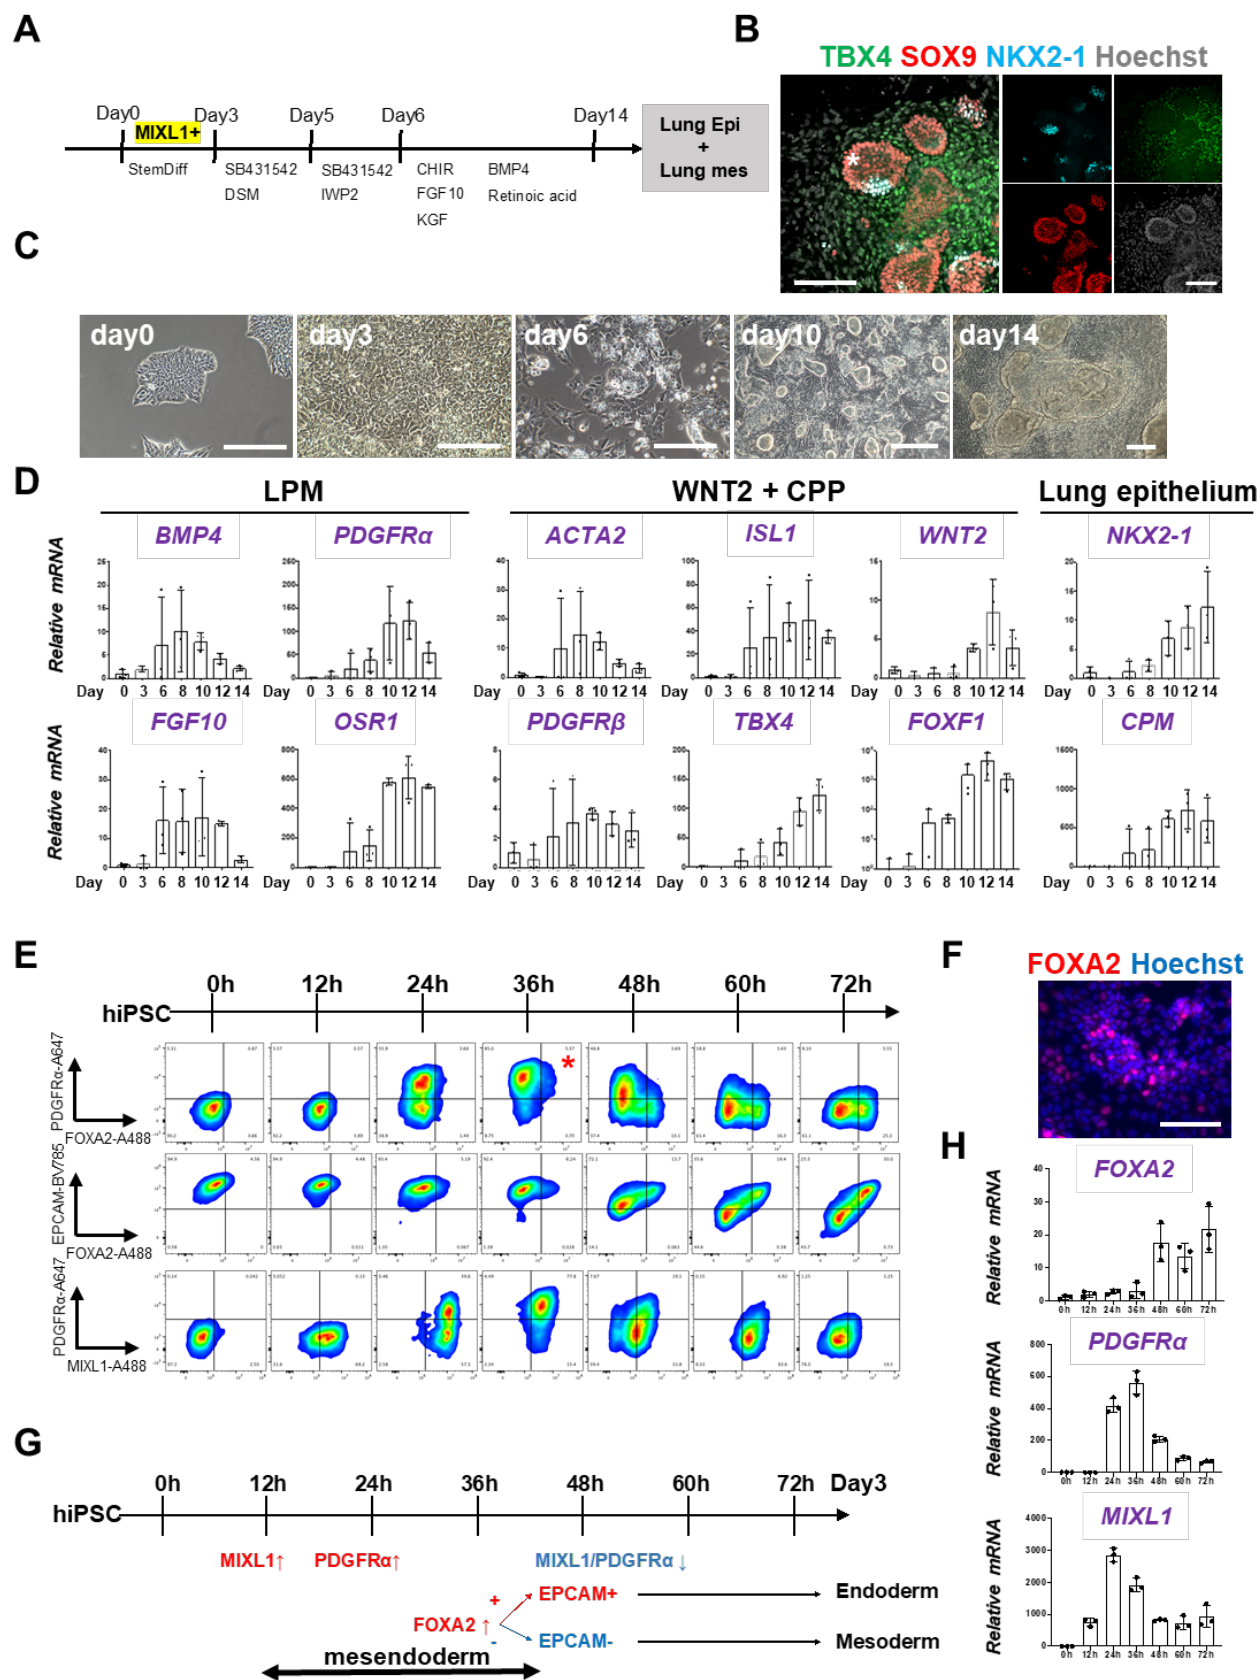

**Figure 3. Co-development of endodermal and mesodermal lung progenitors derived from *MIXL1*<sup>+</sup> *PDGFR*  $\alpha$ <sup>+</sup> *FOXA2*<sup>+</sup> mesendoderm in the directed differentiation protocol using hiPSC.** (A) Schematic culture protocol of hiPSC-derived endodermal and mesodermal lung progenitor cell co-differentiation. (B) Representative IF-confocal imaging of differentiating hiPSCs at day 10 culture. Lung epithelium (NKX2-1), distal lung bud epithelium (SOX9), mesenchyme (TBX4), and nucleus (Hoechst) markers. The budding structures expressed SOX9 and partially NKX2-1 (asterisk), and monolayer cells expressed TBX4. (C) Representative phase-contrast images of the directed differentiation time course (D) qRT-PCR analyses of lung mesenchyme and epithelium markers in time course according to the protocol shown in (A). (E) FCM-based protein kinetic analyses during DE and LPM induction; *MIXL1* expression preceded compared to *PDGFR*  $\alpha$  or *FOXA2*. *FOXA2* appearance in the subset of the *PDGFR*  $\alpha$ <sup>+</sup> population (red asterisk). ( $n = 3$  independent experiments) (F) Representative IF imaging of 36 hours-cultured hiPSCs. (G) Schematic summary of flow cytometry analysis. (H) qRT-PCR analyses further confirmed the preceded *MIXL1* induction and subsequent expression of *PDGFR*  $\alpha$  and *FOXA2*. All graphs: Data normalized by undifferentiated iPSCs. Each plot showed a different biological experiment. Error bars represent mean  $\pm$  SD.



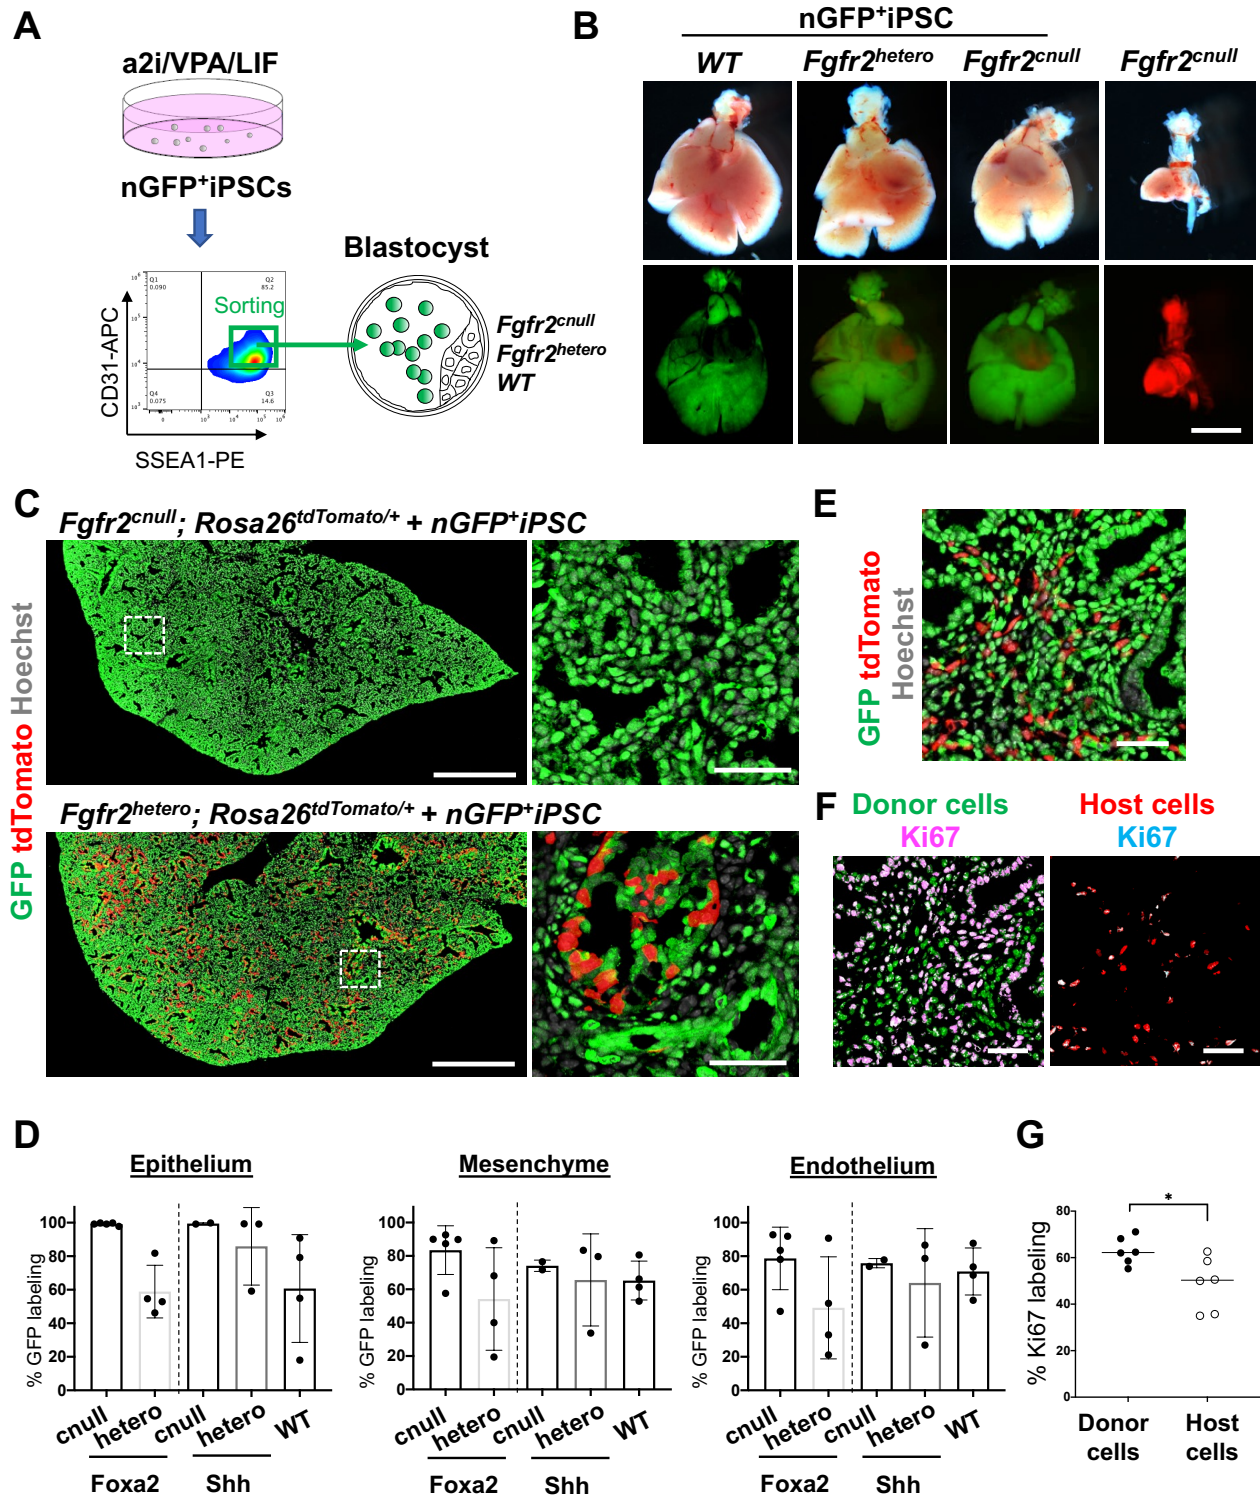

**Figure 4. Generation of the entire lungs in *Foxa2*-driven *Fgfr2*-deficient mice via CBC.**

(A) Schema of CBC experiment: a2i/VPA/LIF-treated SSEA1<sup>high</sup> CD31<sup>high</sup> nGFP<sup>+</sup>iPSCs were sorted and injected into WT, *Fgfr2<sup>hetero</sup>* (heterozygous: *Foxa2<sup>cre/+</sup>; Fgfr2<sup>lox/+</sup>; Rosa26<sup>tdTomato/+</sup>*), and *Fgfr2<sup>cnnull</sup>* (homozygous: *Foxa2<sup>cre/+</sup>; Fgfr2<sup>lox/lox</sup>; Rosa26<sup>tdTomato/+</sup>*) blastocysts. (B) Gross morphology, and



GFP (green: donor nGFP<sup>+</sup>iPSCs-derived signals), and tdTomato (host Foxa2-lineage-derived signals) fluorescence of freshly isolated lungs from E17.5 chimeric *WT* (left), *Fgfr2<sup>hetero</sup>* (left middle), and *Fgfr2<sup>null</sup>* (right middle) that were injected with nGFP<sup>+</sup>iPSCs. Control: littermate *Fgfr2<sup>null</sup>* mouse without nGFP<sup>+</sup>iPSCs injection (right). (C) IF-confocal imaging of E17.5 *Fgfr2<sup>null</sup>* or *Fgfr2<sup>hetero</sup>* lungs injected with nGFP<sup>+</sup>iPSCs. Dotted lines: enlarged images: Compared with littermate control holding host-derived cells (red), E17.5 *Fgfr2<sup>null</sup>* lungs were entirely composed of donor-derived nGFP<sup>+</sup> cells (green). (D) Graphs: % GFP in CD31<sup>+</sup>Epcam<sup>+</sup> lung epithelium, CD31<sup>+</sup>Epcam<sup>-</sup> mesenchyme, and CD31<sup>+</sup>Epcam<sup>-</sup> endothelium analyzed by flow cytometry. Each plot: a different biological animal. *Foxa2<sup>Cre/+</sup>; Fgfr2<sup>null</sup>; Rosa<sup>tdTomato</sup>* ( $n=5$ , independent biological replicates), *Foxa2<sup>Cre/+</sup>; Fgfr2<sup>hetero</sup>; Rosa<sup>tdTomato/+</sup>* ( $n=4$ ), *Shh<sup>Cre/+</sup>; Fgfr2<sup>null</sup>; Rosa<sup>tdTomato/+</sup>* ( $n=2$ ), *Shh<sup>Cre/+</sup>; Fgfr2<sup>hetero</sup>; Rosa<sup>tdTomato/+</sup>* ( $n=3$ ), and *WT* ( $n=4$ ). (E and F) Representative IF staining of E14.5 lung of *Fgfr2<sup>null</sup>*. GFP and tdTomato indicate donor and host-derived cells, respectively. (E-F) Residual tdTomato<sup>+</sup> host cells in E14.5 *Foxa2<sup>Cre/+</sup>; Fgfr2<sup>null</sup>* chimeric lungs. (F) Split images of (E) visualizing GFP<sup>+</sup> donor cells and tdTomato<sup>+</sup> host cells, co-stained with Ki67. (G) Graphs: % Ki67 labeling in mesenchymal cells of E14.5 *Foxa2<sup>Cre/+</sup>; Fgfr2<sup>null</sup>* chimeric lungs. Statistical analyses: paired Student's t-test, significance at  $*P < 0.05$ , ns: non-significant. Scale bars: B, C (left, right), E, F = 1mm, 500 $\mu$ m, 50 $\mu$ m, 20 $\mu$ m, 20 $\mu$ m.

## **TABLES**

**Table. 1 E17.5 Chimerism of Foxa2 promoter-driven conditional blastocyst complementation**

**Table. 2 E14.5 Chimerism of Foxa2 promoter-driven conditional blastocyst complementation**

## Methods

**Mouse.** *Shh*<sup>Cre/+</sup> mice (cat. 05622), *Rosa26*<sup>tdTomato/tdTomato</sup> mice (cat. 07914), *Rosa26*<sup>nT-nG/nT-nG</sup> mice (cat. 023035) and *Pdgfra*<sup>CreERT2/+</sup> mice (cat. 032770) were obtained from the Jackson Lab. X. Zhang kindly gifted *Fgfr2*<sup>fllox/fllox</sup> mice. We further backcrossed these mice for over three generations with CD-1 mice (cat. 022) from the Charles River. Dr. Nicole C Dubois kindly provided *Foxa2*<sup>Cre/Cre</sup> mice (129xB6 mixed background). For conditional deletion of *Fgfr2* (*Fgfr2*<sup>cnul</sup>), we crossed *Fgfr2*<sup>fllox/fllox</sup>; *Rosa26*<sup>tdTomato/tdTomato</sup> females with *Foxa2*<sup>Cre/Cre</sup>; *Fgfr2*<sup>fllox/+</sup>, *Foxa2*<sup>Cre/+</sup>; *Fgfr2*<sup>fllox/+</sup> or *Shh*<sup>Cre/+</sup>; *Fgfr2*<sup>fllox/+</sup> males, respectively. PCR performed genotyping of the *Shh-Cre*, *Pdgfr α-CreERT2*, *Rosa26-nTnG*, and *Rosa26-tdTomato* alleles according to the protocol provided by the vendor. For the CBC, genotyping of chimeric animals was confirmed by GFP-negative sorted liver cells and lung cells. For detecting the *Fgfr2* floxed allele, we performed PCR using the primer sets: FR2-F1, 5'-ATAGGAGCAACAGGCGG-3', and FR2-F2, 5'-CAAGAGGCGACCAGTCA-3' (Mori et al., 2019). For lineage tracing with *Pdgfra*<sup>CreERT2/+</sup>; *Rosa26*<sup>tdTomato/+</sup> mice, 1 dose of 200 μg tamoxifen (MedChem Express, HY-13757A) per g of body weight was given via oral gavage injection. All animal experiments were approved by Columbia University Institutional Animal Care and Use Committee in accordance with US National Institutes of Health guidelines.

**Culture of mouse iPSC.** We cultured iPSC in a2i/VPA/LIF medium on a feeder, as previously reported (Mori et al., 2019). These PSC cells were passaged at a split ratio of 1:10 every 2–3 d.

**Culture of human iPSCs (hiPSCs).** All iPSC lines were maintained in feeder-free conditions on laminin iMatrix-511 silk E8 (Amsbio, AMS.892021) in StemFit 04 complete Medium (Amsbio, SFB-504), supplemented with Primocin (Invivogen, ant-pm-1), and passaged with TrypLE Select (Gibco, A1285901). All human iPSC lines used were characterized for pluripotency and were found to be karyotypically normal. The BU3NGST cell line was kindly gifted by Dr. Finn Hawkins and Dr. Darrell Kotton at Boston University, Boston, MA. Dr. Jennifer Davis, the University of Washington School of Medicine, Seattle, WA, kindly gifted the Rainbow cell line. PD2 and TD1 hiPSC were generated from deidentified commercially available human peripheral blood mononuclear cell and tracheal epithelial cell lines via the manufacturing protocol of Sendai virus-mediated reprogramming (CytoTune2.0) (ThermoFisher, A16517). Every other month, all iPSC lines screened negative for mycoplasma contamination using a MycoAlert PLUS detection kit (Lonza, LT07-710).

**Differentiation of hiPSCs into lung epithelial and mesenchymal cells.** The directed differentiation protocols were modified from previous protocols to maximize lung mesenchymal cell generation concomitantly with NKX2-1<sup>+</sup> lung epithelium. Briefly, DE and LPM precursors were induced once seeded hiPSC-formed colonies by the Activin induction using the STEMdiff Definitive Endoderm Kit (StemCell Technologies, 05110) for 72 hours. Differentiated cells were dissociated and passaged in Laminin511-coated tissue culture plates in a complete serum-free differentiation medium (cSFDm) (Chen et al., 2017). To induce DE and LPM into the anterior foregut endoderm and mesoderm, the cSFDm was supplemented with 10 μM SB431542 (MedChem Express, HY-10431) and 2 μM Dorsomorphin (Tocris, 3093) for 48 hours and 10 μM SB431542 and 2 μM IWP2 (Tocris, 3533) for 24 hours. Cells were then cultured for 7-10 additional days in cSFDm containing 3 μM CHIR99021, 10 ng/ml recombinant human FGF10 (R&D Systems, 345-FG), 10 ng/ml recombinant human KGF (R&D Systems, 251-KG), 10 ng/mL recombinant

human BMP4 (R&D Systems, 314-BP), and 50nM retinoid acid (Sigma-Aldrich, R2625) to induce NKX2-1 positive lung epithelial cells and WNT2<sup>+</sup>TBX4<sup>+</sup> lung mesenchymal cells.

**Immunofluorescence (IF).** Before the immunostaining, antigen retrieval was performed using Unmasking Solution (Vector Laboratories, H-3300) for 10 min at around 100 °C by microwave. 7- $\mu$ m tissue sections were incubated with primary antibodies (Supplementary Table 1) in the buffer of M.O.M. kit (Vector Laboratories, MKB-2213-1) overnight at 4 °C, washed in PBS, and incubated with secondary antibodies conjugated with Alexa488, 567, or 647 (ThermoScientific, 1:400) with NucBlue Fixed Cell Ready Probes Reagent (Hoechst) (ThermoScientific, R37605) for 1.5 h, and mounted with ProLong Gold antifade reagent (Invitrogen, P36930). The images were captured by a Zeiss confocal 710 microscopy.

**Immunocytochemistry.** Cells on culture dishes were fixed with 4% Paraformaldehyde (PFA) for 30 min at room temperature (RT), permeabilized, and blocked with staining buffer containing 0.025% Triton X-100 and 1% BSA for 1 hour at RT. Primary antibodies (Supplementary Table 1) were incubated overnight at 4 °C in the staining buffer. After three washes in PBS, secondary antibodies (Supplementary Table 1) and NucBlue Fixed Cell Ready Probes Reagent (Hoechst) were incubated for 1 h. The samples were imaged using DMi8 Leica widefield microscope.

**Flow cytometry (FCM) analyses of mouse lung tissue.** Lungs from lineage tracing mice at E14.5, E18.5, P0, and four weeks were harvested and prepared for the FCM, as previously described (Mori et al., 2019). Briefly, tissues were minced with microscissors, and 1 ml of pre-warmed dissociation buffer (1 mg/ml DNase (Sigma, DN25), 5 mg/ml collagen (Roche, 10103578001), and 15 U/ml Dispase II (Stemcell Technologies, 7913) in HBSS), incubated at 37 °C on the rocker with 50 r.p.m. speed, and neutralized with the dissociation buffer by FACS buffer containing 2% FBS, Glutamax, 2mM EDTA and 10mM HEPES in HBSS after the 30 min incubation. Digested cells were filtered by the. After filtrating the cells with a 40- $\mu$ m filter (FALCON, 352235), cell pellets were resuspended with 1 ml of cold RBC lysis buffer (Biolegend, 420301) to lyse the remaining erythrocytes for 5 min on ice, and neutralized by 1 ml cold FACS buffer. After that, it was centrifuged them at 350 rcf, 4 °C, for 3 min to remove the lysed blood cells. For FCM analysis, one million cells were transferred in 100  $\mu$ l of FACS buffer supplemented with 0.5  $\mu$ M Y27632 and then added 2  $\mu$ l Fc Block (BD Pharmingen, 553141) per sample followed by 10 min incubation on ice. Cells were incubated with the following antibodies: CD31-APC (Biolegend, 102510, 1/50), Epcam-BV711 (BioLegend, 118233, 1/50), or Epcam-BV421 (Biolegend, 118225, 1/50), Aqua Zombie (BioLegend, 423101, 1/100), CD45-BV605 (BioLegend, 103104, 1/50) for 30 min on ice. After staining, cells were washed twice with FACS buffer before resuspending in 500  $\mu$ l FACS buffer for the subsequent analyses using SONY MA900 or NovoCyte. Compensation was manually performed to minimize the tdTomato signal leakage to the GFP channel using FlowJo (ver. 10. 7. 1).

**nGFP<sup>+</sup>iPSC establishment and preparation for CBC donor.**

E14.5 lung tissues of *Rosa26<sup>nTnG/nTnG</sup>* mice (JAX, cat. 023035, C57BL/6NJ background) were harvested in a dissociation buffer described above. The dissociated cells were seeded on a 10cm dish, and only lung fibroblast survived after 1 week in MEF medium (Mori et al., 2019). The fibroblasts were passaged using Accutase (Innovative Cell Technologies, AT104) and seeded on gelatin (Millipore-Sigma, ES006B)-coated 6-well plates with a density of 0.1 million cells per

well. Upon cell attachment, Yamanaka reprogramming factors were induced to iPSCs via Sendai virus using CytoTune2.0 (ThermoFisher, A16517). To establish nGFP<sup>+</sup> iPSCs, the Cre plasmid was transfected using Eugene HD transfection reagent (Promega, E2311), then sorted out GFP<sup>+</sup>tdTomato<sup>+</sup> live cells by FACS (SONYMA900), and single clones were expanded.

For the CBC donor cell preparation, nGFP<sup>+</sup>iPSCs cultured in a2i/VPA/LIF(Mori et al., 2019) were trypsinized and resuspended in 4 ml cold DMEM + 10% FBS immediately and filtering the cells with a 40-μm filter. Cells were centrifuged at 350 rcf, 4 °C, for 3 min, and the supernatant was removed. After being washed with flow buffer containing 0.2% BSA, 1% Glutamax, and 1μM Y27632, the cells were resuspended in 100μl/1 million cells with flow buffer. The following antibodies were added: Epcam-BV421 (1:50), SSEA1-PE (1:50), CD31-APC (1:50), Zombie Aqua Fixable Viability Kit (1:100). Epcam<sup>high</sup>SSEA1<sup>high</sup>CD31<sup>high</sup> cells were sorted by FACS (SONYMA900) and subsequently prepared for the injection.

**Blastocyst preparation and embryo transfer.** Blastocysts were prepared by mating *Foxa2*<sup>Cre/Cre</sup>; *Fgfr2*<sup>lox/+</sup>, *Foxa2*<sup>Cre/+</sup>; *Fgfr2*<sup>lox/+</sup> or *Shh*<sup>Cre/+</sup>; *Fgfr2*<sup>lox/+</sup> males (all 129 x B6 x CD-1 background) with superovulated *Fgfr2*<sup>lox/lox</sup>; *Rosa26*<sup>tdTomato/tdTomato</sup> females (129 x B6 x CD-1 background). Blastocysts were harvested at E3.5 after superovulation(Mori et al., 2019). 20 sorted nGFP<sup>+</sup>iPSCs were injected into each blastocyst. After the iPSC injection, blastocysts were cultured in an M2 medium (Cosmobio) for a few hours in a 37 °C, 5% CO<sub>2</sub> incubator for recovery. Then, blastocysts were transferred to the uterus of the pseudopregnant foster mother.

**Real-time-quantitative RT-PCR (qRT-PCR).** Total RNA was extracted using a Direct-zol<sup>TM</sup> RNA MiniPrep Plus kit (Zymo Research, R2072), and cDNA was synthesized using Primescript<sup>TM</sup> RT Master Mix (Takara, RR036B). The cDNAs were then used as templates for qRT-PCR analysis with gene-specific primers. Reactions (10 μl) were performed Luna® Universal qPCR Master Mix (New England Biolabs, M3003X). mRNA abundance for each gene was determined relative to GAPDH mRNA using the 2<sup>-ΔΔCt</sup> method. The primers were listed in the Supplemental Table. 2. Data were represented as mean ± SD of measurements. The number of animals or cells per group is provided in the legends. The undetected values in each biological experiment in Fig.3d were removed from the graphs.

**Statistical analysis.** Data analysis was performed using Prism 8. Data acquired by performing biological replicas of two or three independent experiments are presented as the mean ± SD. Statistical significance was determined using a two-tailed t-test and unpaired one-way or two-way ANOVA with the Tukey post hoc test. \**P* < 0.05, \*\**P* < 0.01, \*\*\**P* < 0.001, ns: non-significant.

**Data availability.** The authors declare that all data supporting the results of this study are available within the paper and the Supplementary Information. Raw data are available from the corresponding author upon reasonable request.

## References

Arman E, Haffner-Krausz R, Gorivodsky M, Lonai P. 1999. *Fgfr2* is required for limb outgrowth and lung-branching morphogenesis. *Proceedings of the National Academy of Sciences* 96:11895–11899. doi:10.1073/pnas.96.21.11895

- Artus J, Panthier JJ, Hadjantonakis AK. 2010. A role for PDGF signaling in expansion of the extra-embryonic endoderm lineage of the mouse blastocyst. *Development* **137**:3361–3372. doi:10.1242/dev.050864
- Bardot E, Calderon D, Santoriello F, Han S, Cheung K, Jadhav B, Burtscher I, Artap S, Jain R, Epstein J, Lickert H, Gouon-Evans V, Sharp AJ, Dubois NC. 2017. Foxa2 identifies a cardiac progenitor population with ventricular differentiation potential. *Nat Commun* **8**:1–15. doi:10.1038/ncomms14428
- Cardoso W v, Kotton DN. 2008. Specification and patterning of the respiratory system. *Stembook* 1–18. doi:10.3824/stembook.1.10.1
- Chen J, Lansford R, Stewart V, Young F, Alt FW. 1993. RAG-2-deficient blastocyst complementation: an assay of gene function in lymphocyte development. *Proceedings of the National Academy of Sciences* **90**:4528–4532. doi:10.1073/pnas.90.10.4528
- Chen Y-W, Huang SX, de Carvalho ALRT, Ho S-H, Islam MN, Volpi S, Notarangelo LD, Ciancanelli M, Casanova J-L, Bhattacharya J, Liang AF, Palermo LM, Porotto M, Moscona A, Snoeck H-W. 2017. A three-dimensional model of human lung development and disease from pluripotent stem cells. *Nat Cell Biol* **19**:542–549. doi:10.1038/ncb3510
- Christodoulou C, Longmire TA, Shen SS, Bourdon A, Sommer CA, Gadue P, Spira A, Gouon-Evans V, Murphy GJ, Mostoslavsky G, Kotton DN. 2011. Mouse ES and iPS cells can form similar definitive endoderm despite differences in imprinted genes. *Journal of Clinical Investigation* **121**:2313–2325. doi:10.1172/JCI43853
- Crapo JD, Barry BE, Gehr P, Bachofen M, Weibel ER. 1982. Cell number and cell characteristics of the normal human lung. *American Review of Respiratory Disease* **126**:332–337. doi:10.1164/arrd.1982.126.2.332
- De Langhe SP, Carraro G, Warburton D, Hajihosseini MK, Bellusci S. 2006. Levels of mesenchymal FGFR2 signaling modulate smooth muscle progenitor cell commitment in the lung. *Dev Biol* **299**:52–62. doi:10.1016/j.ydbio.2006.07.001
- De Moerlooze L, Spencer-Dene B, Revest JM, Hajihosseini M, Rosewell I, Dickson C. 2000. An important role for the IIIb isoform of fibroblast growth factor receptor 2 (FGFR2) in mesenchymal-epithelial signalling during mouse organogenesis. *Development* **127**:483–92.
- Devine WP, Wythe JD, George M, Koshiba-Takeuchi K, Bruneau BG. 2014. Early patterning and specification of cardiac progenitors in gastrulating mesoderm. *Elife* **3**. doi:10.7554/ELIFE.03848
- Gotoh S, Ito I, Nagasaki T, Yamamoto Y, Konishi S, Korogi Y, Matsumoto H, Muro S, Hirai T, Funato M, Mae SI, Toyoda T, Sato-Otsubo A, Ogawa S, Osafune K, Mishima M. 2014. Generation of alveolar epithelial spheroids via isolated progenitor cells from human pluripotent stem cells. *Stem Cell Reports* **3**:394–403. doi:10.1016/j.stemcr.2014.07.005
- Green MD, Chen A, Nostro M-C, d'Souza SL, Schaniel C, Lemischka IR, Gouon-Evans V, Keller G, Snoeck H-W. 2011. Generation of anterior foregut endoderm from human embryonic and induced pluripotent stem cells. *Nat Biotechnol* **29**:267–72. doi:10.1038/nbt.1788
- Guyette JP, Gilpin SE, Charest JM, Tapias LF, Ren X, Ott HC. 2014. Perfusion decellularization of whole organs. *Nat Protoc* **9**:1451–68. doi:10.1038/nprot.2014.097
- Hackett TL, Knight D a, Sin DD. 2010. Potential role of stem cells in management of COPD. *Int J Chron Obstruct Pulmon Dis* **5**:81–8.
- Hamanaka S, Umino A, Sato H, Hayama T, Yanagida A, Mizuno N, Kobayashi T, Kasai M, Suchy FP, Yamazaki S, Masaki H, Yamaguchi T, Nakauchi H. 2018. Generation of



- Vascular Endothelial Cells and Hematopoietic Cells by Blastocyst Complementation. *Stem Cell Reports* **11**:988–997. doi:10.1016/j.stemcr.2018.08.015
- Han L, Chaturvedi P, Kishimoto K, Koike H, Nasr T, Iwasawa K, Giesbrecht K, Witcher PC, Eicher A, Haines L, Lee Y, Shannon JM, Morimoto M, Wells JM, Takebe T, Zorn AM. 2020. Single cell transcriptomics identifies a signaling network coordinating endoderm and mesoderm diversification during foregut organogenesis. *Nat Commun* **11**. doi:10.1038/s41467-020-17968-x
- Harris KS, Zhang Z, McManus MT, Harfe BD, Sun X. 2006. Dicer function is essential for lung epithelium morphogenesis. *Proc Natl Acad Sci U S A* **103**:2208–13. doi:10.1073/pnas.0510839103
- Hart AH, Hartley L, Sourris K, Stadler ES, Li R, Stanley EG, Tam PPL, Elefanty AG, Robb L. 2002. Mixl1 is required for axial mesendoderm morphogenesis and patterning in the murine embryo. *Development* **129**:3597–608.
- Hawkins F, Kramer P, Jacob A, Driver I, Thomas DC, Mccauley KB, Skvir N, Crane AM, Kurmann AA, Hollenberg AN, Nguyen S, Wong BG, Khalil AS, Huang SXL, Guttentag S, Rock JR, Shannon JM, Davis BR, Kotton DN. 2017. Prospective isolation of NKX2-1 – expressing human lung progenitors derived from pluripotent stem cells. *J Clin Invest* **127**:1–18. doi:10.1172/JCI89950
- Horn S, Kobberup S, Jørgensen MC, Kalisz M, Klein T, Kageyama R, Gegg M, Lickert H, Lindner J, Magnuson MA, Kong YY, Serup P, Ahnfelt-Rønne J, Jensen JN. 2012. Mind bomb 1 is required for pancreatic  $\beta$ -cell formation. *Proc Natl Acad Sci U S A* **109**:7356–7361. doi:10.1073/pnas.1203605109
- Huang SXL, Islam MN, O'Neill J, Hu Z, Yang Y-G, Chen Y-W, Mumau M, Green MD, Vunjak-Novakovic G, Bhattacharya J, Snoeck H-W. 2014. Efficient generation of lung and airway epithelial cells from human pluripotent stem cells. *Nat Biotechnol* **32**:84–91. doi:10.1038/nbt.2754
- Kadzic RS, Morrissey EE. 2012. Directing lung endoderm differentiation in pluripotent stem cells. *Cell Stem Cell* **10**:355–61. doi:10.1016/j.stem.2012.03.013
- Kemter E, Schnieke A, Fischer K, Cowan PJ, Wolf E. 2020. Xeno-organ donor pigs with multiple genetic modifications - the more the better? *Curr Opin Genet Dev* **64**:60–65. doi:10.1016/J.GDE.2020.05.034
- Kitahara A, Ran Q, Oda K, Yasue A, Abe M, Ye X, Sasaoka T, Tsuchida M, Sakimura K, Ajioka Y, Saijo Y, Zhou Q. 2020. Generation of Lungs by Blastocyst Complementation in Apneumic Fgf10-Deficient Mice. *Cell Rep* **31**:107626. doi:10.1016/J.CELREP.2020.107626
- Kobayashi T, Yamaguchi T, Hamanaka S, Kato-Itoh M, Yamazaki Y, Ibata M, Sato H, Lee Y-S, Usui J-I, Knisely a S, Hirabayashi M, Nakauchi H. 2010. Generation of rat pancreas in mouse by interspecific blastocyst injection of pluripotent stem cells. *Cell* **142**:787–99. doi:10.1016/j.cell.2010.07.039
- Konishi S, Gotoh S, Tateishi K, Yamamoto Y, Korogi Y, Nagasaki T, Matsumoto H, Muro S, Hirai T, Ito I, Tsukita S, Mishima M. 2016. Directed Induction of Functional Multi-ciliated Cells in Proximal Airway Epithelial Spheroids from Human Pluripotent Stem Cells. *Stem Cell Reports* **6**:18–25. doi:10.1016/j.stemcr.2015.11.010
- Kopper O, Benvenisty N. 2012. Stepwise differentiation of human embryonic stem cells into early endoderm derivatives and their molecular characterization. *Stem Cell Res* **8**:335–345. doi:10.1016/j.scr.2011.12.006

- Kotton DN, Morrissey EE. 2014. Lung regeneration: Mechanisms, applications and emerging stem cell populations. *Nat Med* **20**:822–832. doi:10.1038/nm.3642
- Li E, Ustiyan V, Wen B, Kalin GT, Whitsett JA, Kalin T v., Kalinichenko V v. 2021. Blastocyst complementation reveals that NKX2-1 establishes the proximal-peripheral boundary of the airway epithelium. *Dev Dyn* **250**:1001–1020. doi:10.1002/DVDY.298
- Mori M, Furuhashi K, Danielsson JA, Hirata Y, Kakiuchi M, Lin CS, Ohta M, Riccio P, Takahashi Y, Xu X, Emala CW, Lu C, Nakauchi H, Cardoso W v. 2019. Generation of functional lungs via conditional blastocyst complementation using pluripotent stem cells. *Nat Med* **25**:1691–1698. doi:10.1038/s41591-019-0635-8
- Ng WH, Johnston EK, Tan JJ, Bliley JM, Feinberg AW, Stolz DB, Sun M, Wijesekara P, Hawkins F, Kotton DN, Ren X. 2022. Recapitulating Human Cardio-pulmonary Co-development Using Simultaneous Multilineage Differentiation of Pluripotent Stem Cells. *Elife* **11**:1–27. doi:10.7554/eLife.67872
- Ott HC, Clippinger B, Conrad C, Schuetz C, Pomerantseva I, Ikonomou L, Kotton D, Vacanti JP. 2010. Regeneration and orthotopic transplantation of a bioartificial lung. *Nat Med* **16**:927–33. doi:10.1038/nm.2193
- Peng T, Tian Y, Boogerd CJ, Lu MM, Kadzik RS, Stewart KM, Evans SM, Morrissey EE. 2013. Coordination of heart and lung co-development by a multipotent cardiopulmonary progenitor. *Nature* **500**:589–592. doi:10.1038/nature12358
- Petersen TH, Calle EA, Zhao L, Lee EJ, Gui L, Raredon MSB, Gavrillov K, Yi T, Zhuang ZW, Breuer C, Herzog E, Niklason LE. 2010. Tissue-engineered lungs for in vivo implantation. *Science (1979)* **329**:538–541. doi:10.1126/science.1189345
- Pijuan-Sala B, Griffiths JA, Guibentif C, Hiscock TW, Jawaid W, Calero-Nieto FJ, Mulas C, Ibarra-Soria X, Tyser RCV, Ho DLL, Reik W, Srinivas S, Simons BD, Nichols J, Marioni JC, Göttgens B. 2019. A single-cell molecular map of mouse gastrulation and early organogenesis. *Nature* **566**:490–495. doi:10.1038/s41586-019-0933-9
- Scheibner K, Schirge S, Burtscher I, Büttner M, Sterr M, Yang D, Böttcher A, Ansarullah, Irmeler M, Beckers J, Cernilogar FM, Schotta G, Theis FJ, Lickert H. 2021. Epithelial cell plasticity drives endoderm formation during gastrulation. *Nat Cell Biol* **23**:692–703. doi:10.1038/s41556-021-00694-x
- Sekine K, Ohuchi H, Fujiwara M, Yamasaki M, Yoshizawa T, Sato T, Yagishita N, Matsui D, Koga Y, Itoh N, Kato S. 1999. Fgf10 is essential for limb and lung formation. *Nat Genet* **21**:138–41. doi:10.1038/5096
- Stone KC, Mercer RR, Gehr P, Stockstill B, Crapo JD. 1992. Allometric Relationships of Cell Numbers and Size in the Mammalian Lung. *Am J Respir Cell Mol Biol* **6**:235–243.
- Tada S, Era T, Furusawa C, Sakurai H, Nishikawa S, Kinoshita M, Nakao K, Chiba T, Nishikawa SI. 2005. Characterization of mesendoderm: A diverging point of the definitive endoderm and mesoderm in embryonic stem cell differentiation culture. *Development* **132**:4363–4374. doi:10.1242/dev.02005
- Tian L, Gao J, Garcia IM, Chen HJ, Castaldi A, Chen YW. 2021. Human pluripotent stem cell-derived lung organoids: Potential applications in development and disease modeling. *Wiley Interdiscip Rev Dev Biol* **10**:1–16. doi:10.1002/wdev.399
- Tian Y, Zhang Y, Hurd L, Hannenhalli S, Liu F, Lu MM, Morrissey EE. 2011. Regulation of lung endoderm progenitor cell behavior by miR302/367. *Development* **138**:1235–45. doi:10.1242/dev.061762

- Travaglini KJ, Nabhan AN, Penland L, Sinha R, Gillich A, Sit R v., Chang S, Conley SD, Mori Y, Seita J, Berry GJ, Shrager JB, Metzger RJ, Kuo CS, Neff N, Weissman IL, Quake SR, Krasnow MA. 2020. A molecular cell atlas of the human lung from single-cell RNA sequencing. *Nature* **587**:619–625. doi:10.1038/s41586-020-2922-4
- Usui J, Kobayashi T, Yamaguchi T, Knisely a S, Nishinakamura R, Nakauchi H. 2012. Generation of kidney from pluripotent stem cells via blastocyst complementation. *Am J Pathol* **180**:2417–26. doi:10.1016/j.ajpath.2012.03.007
- Wan H, Kaestner KH, Ang SL, Ikegami M, Finkelman FD, Stahlman MT, Fulkerson PC, Rothenberg ME, Whitsett JA. 2004. Foxa2 regulates alveolarization and goblet cell hyperplasia. *Development* **131**:953–964. doi:10.1242/dev.00966
- Wang X. 2019. Bioartificial Organ Manufacturing Technologies. *Cell Transplant* **28**:5–17. doi:10.1177/0963689718809918
- Weaver M, Yingling JM, Dunn NR, Bellusci S, Hogan BL. 1999. Bmp signaling regulates proximal-distal differentiation of endoderm in mouse lung development. *Development* **126**:4005–4015.
- Wen B, Li E, Ustiyani V, Wang G, Guo M, Na CL, Kalin GT, Galvan V, Xu Y, Weaver TE, Kalin T v., Whitsett JA, Kalinichenko V v. 2021. In vivo generation of lung and thyroid tissues from embryonic stem cells using blastocyst complementation. *Am J Respir Crit Care Med* **203**:471–483. doi:10.1164/RCCM.201909-1836OC/SUPPL\_FILE/DISCLOSURES.PDF
- Xing Y, Li C, Hu L, Tiozzo C, Li M, Chai Y, Bellusci S, Anderson S, Minoo P. 2008. Mechanisms of TGFbeta inhibition of LUNG endodermal morphogenesis: the role of TbetaRII, Smads, Nkx2.1 and Pten. *Dev Biol* **320**:340–50. doi:10.1016/j.ydbio.2008.04.044
- Yamaguchi T, Sato H, Kato-Itoh M, Goto T, Hara H, Sanbo M, Mizuno N, Kobayashi T, Yanagida A, Umino A, Ota Y, Hamanaka S, Masaki H, Rashid ST, Hirabayashi M, Nakauchi H. 2017. Interspecies organogenesis generates autologous functional islets. *Nature* **542**:191–196. doi:10.1038/nature21070

#### SUPPLEMENTAL FIGURES.

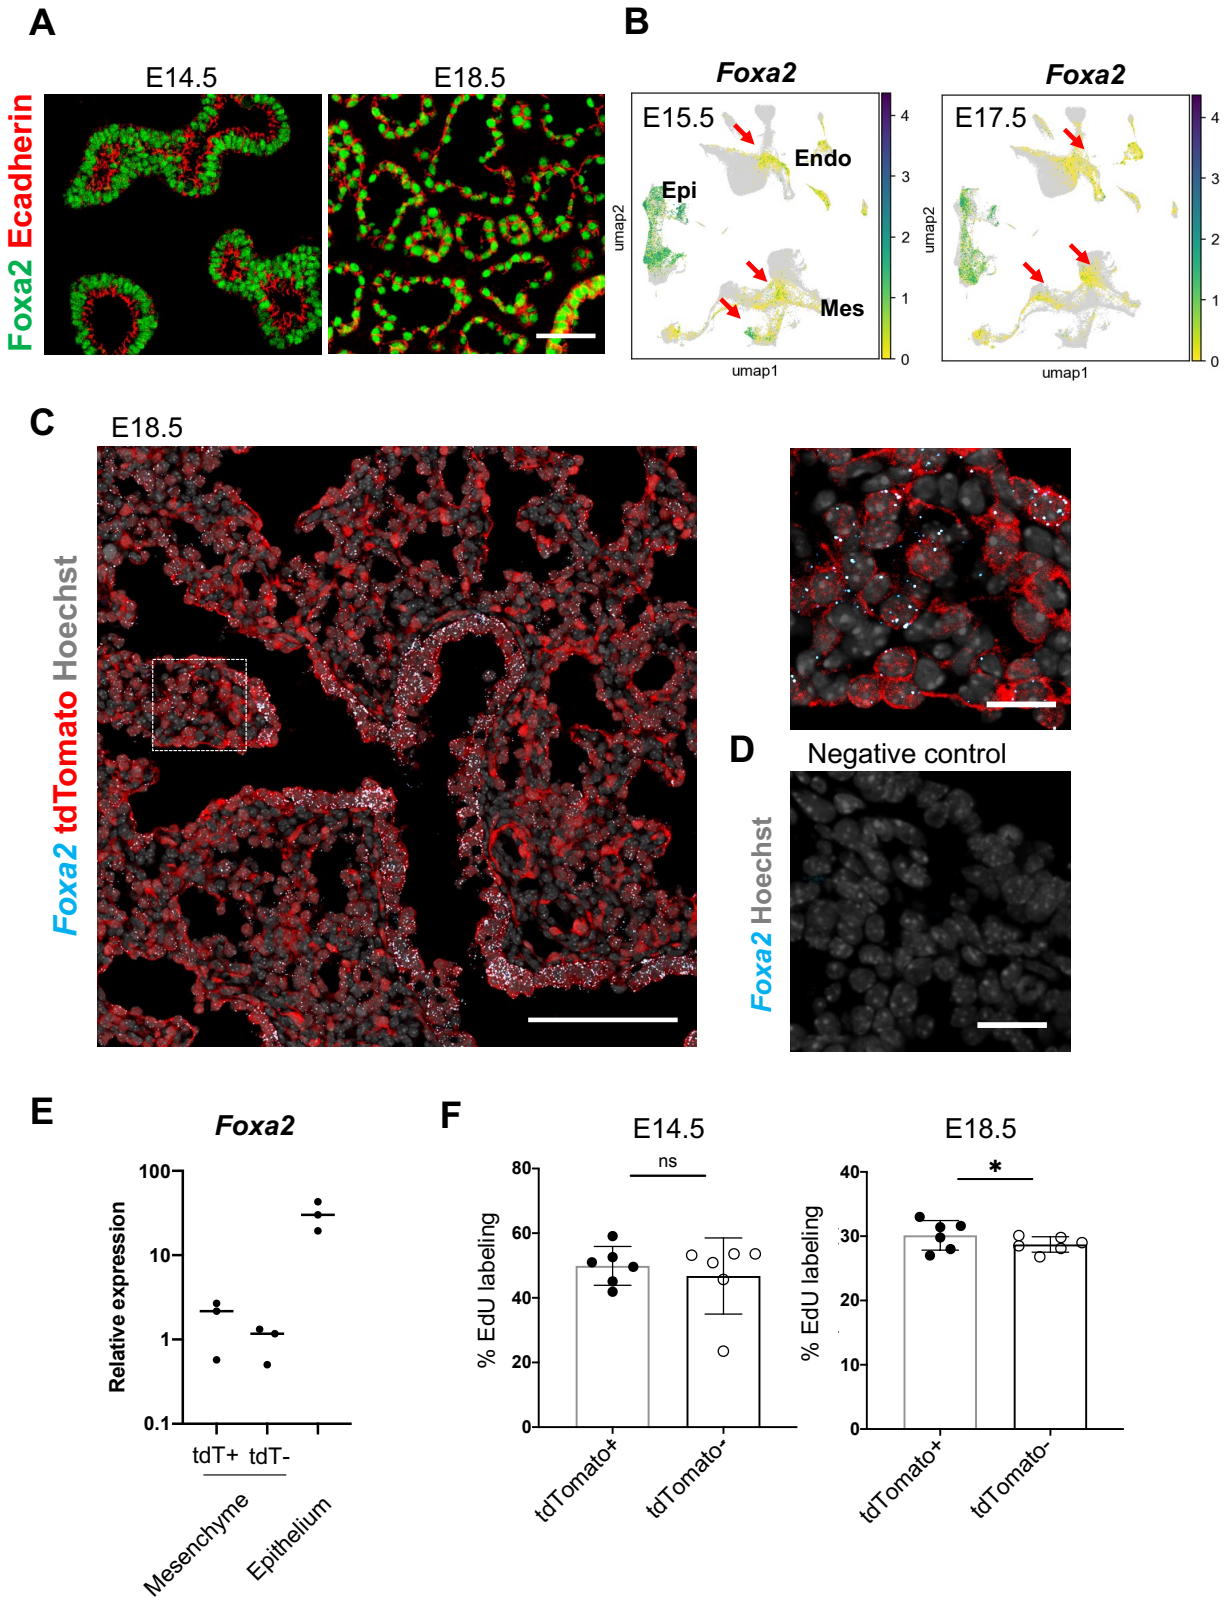

**Figure S1. Foxa2-lineage gradually increased in the mesenchyme and endothelial cells during mouse lung development.** (A) Representative IF-confocal imaging of E14.5 and E18.5 mouse embryonic lungs. Foxa2 (green) was expressed in lung epithelial cells labeled by E-cadherin (red) but not in E-cadherin negative lung mesenchymal area. Scale bar = 50 $\mu$ m (B) Single-cell analysis of mouse LungMAP. Foxa2 expression was observed in lung mesenchyme and endothelium in E15.5 and E17.5 (Arrows). (C), (D) Representative IF and in situ hybridization-confocal imaging of E18.5 mouse embryonic lungs. Dotted lines: enlarged image. Foxa2 mRNA was expressed in lung epithelial cells and lung mesenchyme. Most of the Foxa2 mRNA expression was colocalized with tdTomato. Scale bars (left, right) = 50  $\mu$ m, 20 $\mu$ m (E) Graphs: Foxa2 qPCR for tdTomato (tdT)<sup>+</sup> or tdTomato<sup>-</sup> CD45<sup>-</sup> CD31<sup>-</sup> EPCAM<sup>-</sup> mesenchymal cells and CD45<sup>-</sup>CD31<sup>-</sup>EpcAM<sup>+</sup> epithelial cells sorted by FACS from E18.5 Foxa2-lineage tracing mice. (n = 3, each biological replicate) (F) Flow cytometry quantitative analyses: EdU labeling cells in CD31<sup>+</sup>Epcam<sup>-</sup> endothelium at E14.5 and E18.5 (n = 6 each independent biological replicates, respectively) of Foxa2<sup>Crel/+</sup>; Rosa<sup>tdTomato/+</sup> lungs. Statistical analysis: paired Student's t-test, significance at \**P* < 0.05, ns: non-significant.



**A**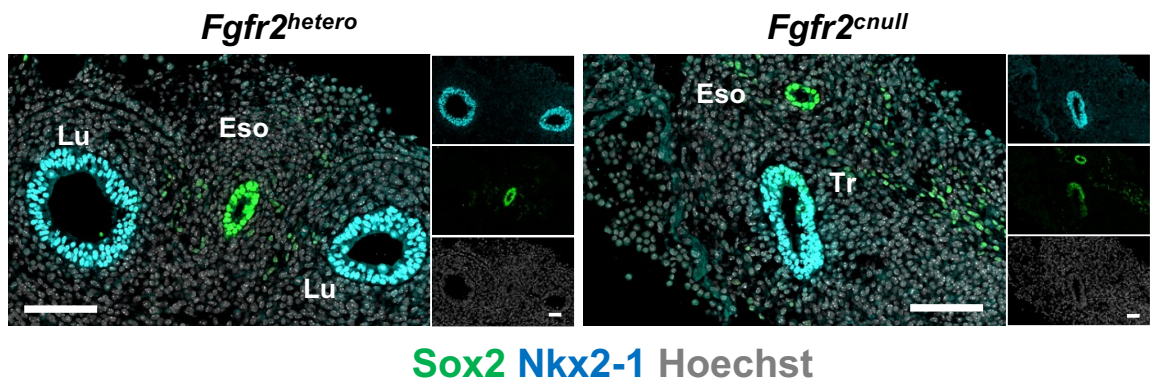**B**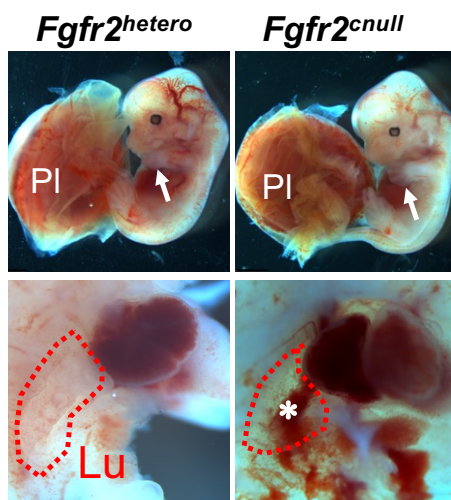**C**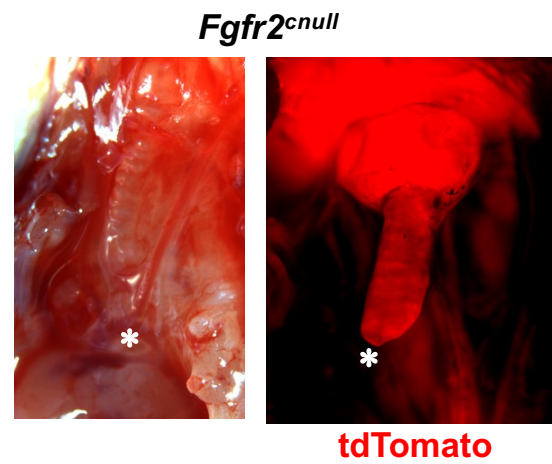**D**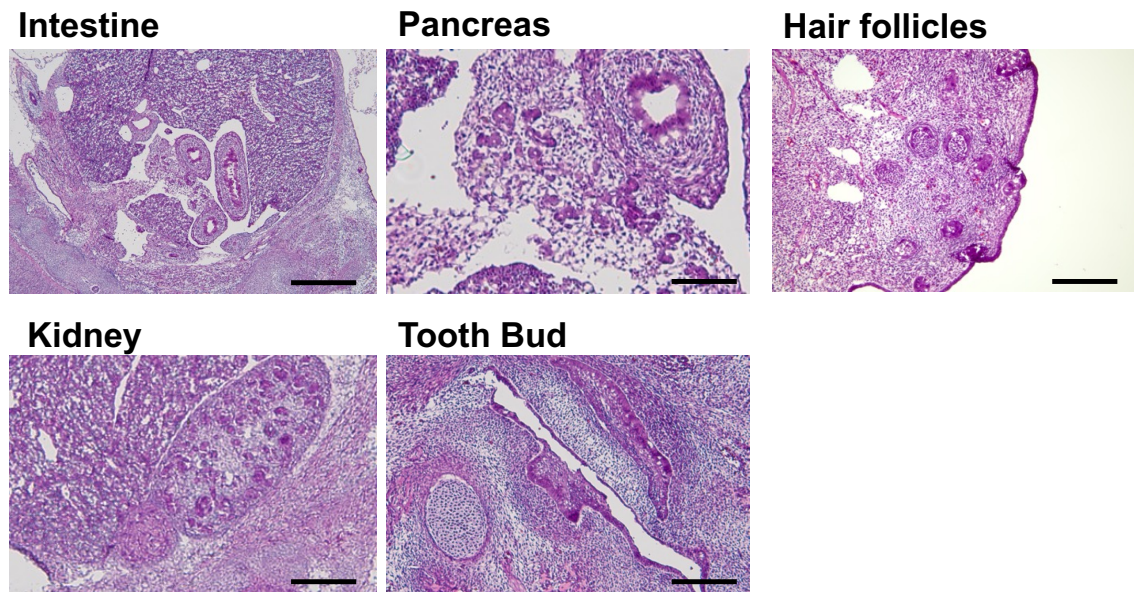



**Figure S2. Lung agenesis phenotype in the *Foxa2<sup>Cre/+</sup>Fgfr2<sup>cnul</sup>* mice.**

(A) Representative IF staining of E10.5 *Foxa2<sup>Cre/+</sup>;Fgfr2<sup>hetero</sup>* and *Foxa2<sup>Cre/+</sup>;Fgfr2<sup>cnul</sup>*: *Fgfr2<sup>cnul</sup>* did not form Sox2<sup>+</sup>NKX2-1<sup>+</sup>proximal airway bifurcation. Scale bar = 200μm. Lu: lung, Eso: Esophagus. Tr: trachea. Nkx2-1 (blue), Sox2 (green). (B) Representative Gross morphology of E14.5 *Foxa2<sup>Cre/+</sup>;Fgfr2<sup>hetero</sup>* and *Foxa2<sup>Cre/+</sup>;Fgfr2<sup>cnul</sup>*: No difference in the appearance of the embryo between *Fgfr2<sup>hetero</sup>* and *Fgfr2<sup>cnul</sup>* (Top). Limb (arrows) and placenta (pl) are present in mice of all genotypes. Conversely, the *Fgfr2<sup>cnul</sup>* embryo showed lung agenesis phenotype (Bottom, asterisk) (n = 6 per each group). (C) Representative image of *Fgfr2<sup>cnul</sup>* lungs. Foxa2 lineage<sup>+</sup> tdTomato signal indicates the trachea ends in the middle of the thoracic cavity (asterisk). (D) HE staining: The internal organs such as the intestine, pancreas, kidney, tooth buds, and hair follicles were normally formed in *Fgfr2<sup>cnul</sup>* E16.5 embryos. Scale bar = 500μm.

**A**

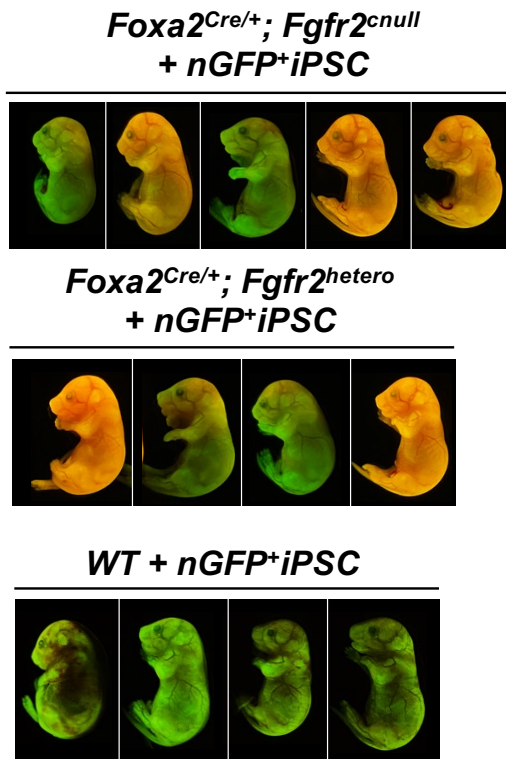

**C**

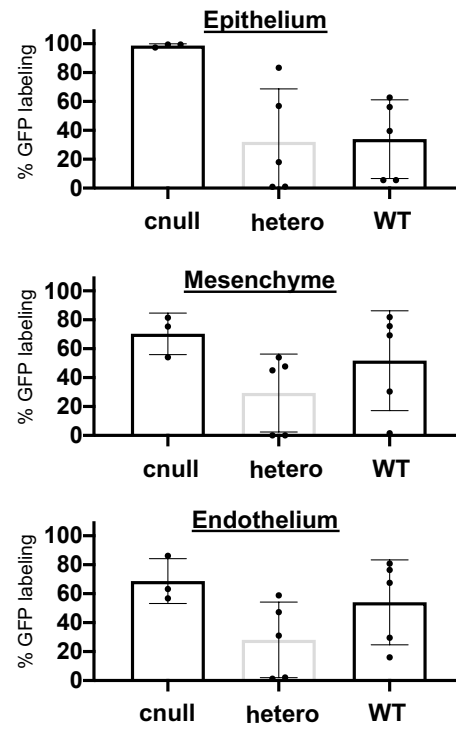

**B**

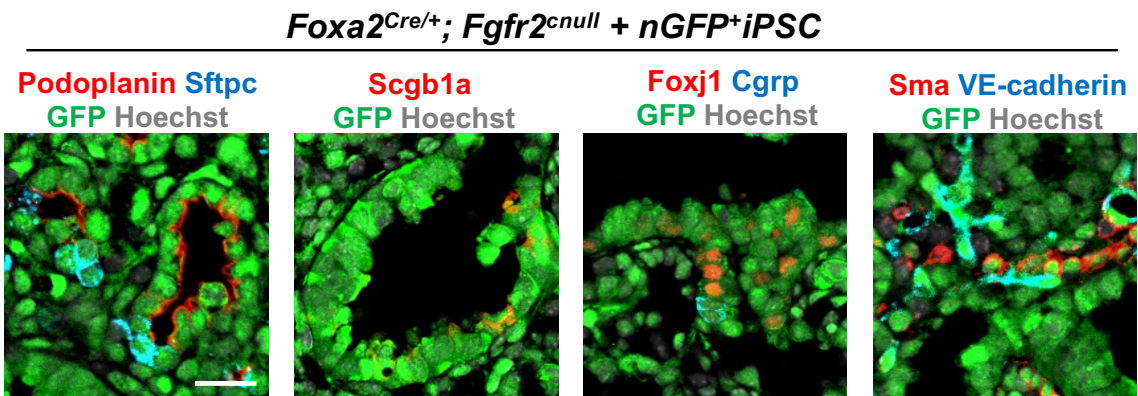

**D**

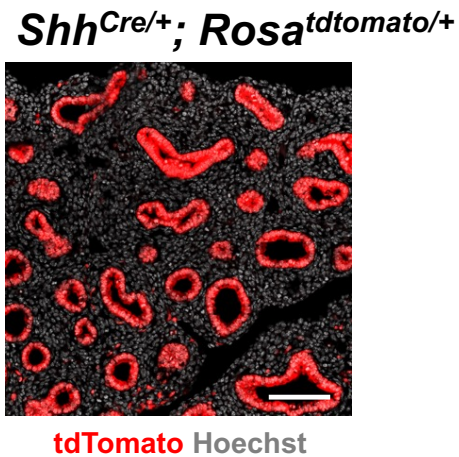

**Figure S3. The complemented embryos of *Foxa2*<sup>Cre/+</sup>; *Fgfr2*<sup>cnul</sup> +nGFP+iPSCs showed normal gross morphology and various chimerism** (A) Representative gross morphology of chimeric embryos of *WT* + nGFP+iPSCs, *Foxa2*<sup>Cre/+</sup>; *Fgfr2*<sup>hetero</sup> + nGFP+iPSCs, *Foxa2*<sup>Cre/+</sup>; *Fgfr2*<sup>cnul</sup> +nGFP+iPSCs. The color indicated various GFP<sup>+</sup> chimerism on the skin of those embryos and the residual host *Foxa2*- lineage<sup>+</sup> tdTomato signals. (B) Representative IF-confocal imaging of E17.5 lungs of chimeric *Fgfr2*<sup>cnul</sup> + nGFP+iPSCs. The E17.5 rescued lungs from *Fgfr2*<sup>cnul</sup> +nGFP+iPSCs expressed differentiated cell markers such as Podoplanin (alveolar type1 cells), Sftpc (type 2 cells), Scg1a1 (club cells), Foxj1 (multiciliated cells), Cgrp (neuroendocrine cells), Sma (smooth muscle cells), and VE-cadherin (endothelial cells). Scale bar = 20μm. (C) Graphs: % of donor cell chimerism: % of GFP in CD31<sup>+</sup>Epcam<sup>+</sup> lung epithelium fraction, CD31<sup>+</sup>Epcam<sup>-</sup> mesenchyme, and CD31<sup>+</sup>Epcam<sup>-</sup> endothelium analyzed by flow cytometry. Each plot: a different biological animal (see table 2). *Foxa2*<sup>Cre/+</sup>; *Fgfr2*<sup>cnul</sup>; *Rosa*<sup>tdTomato</sup> (*n*=3, independent biological replicates), *Foxa2*<sup>Cre/+</sup>; *Fgfr2*<sup>hetero</sup>; *Rosa*<sup>tdTomato/+</sup> (*n*=5), and *WT* (*n*=5) at E14.5. (D) Representative IF-confocal imaging of E14.5 *Shh*-lineage tracing mouse lungs (*Shh*<sup>Cre/+</sup>; *Rosa*<sup>tdTomato/+</sup>). *Shh*-lineage labeled the entire lung epithelium but rarely mesenchyme, distinct from *Foxa2* lineage mice (see Fig. 2F). Scale bar = 100μm.

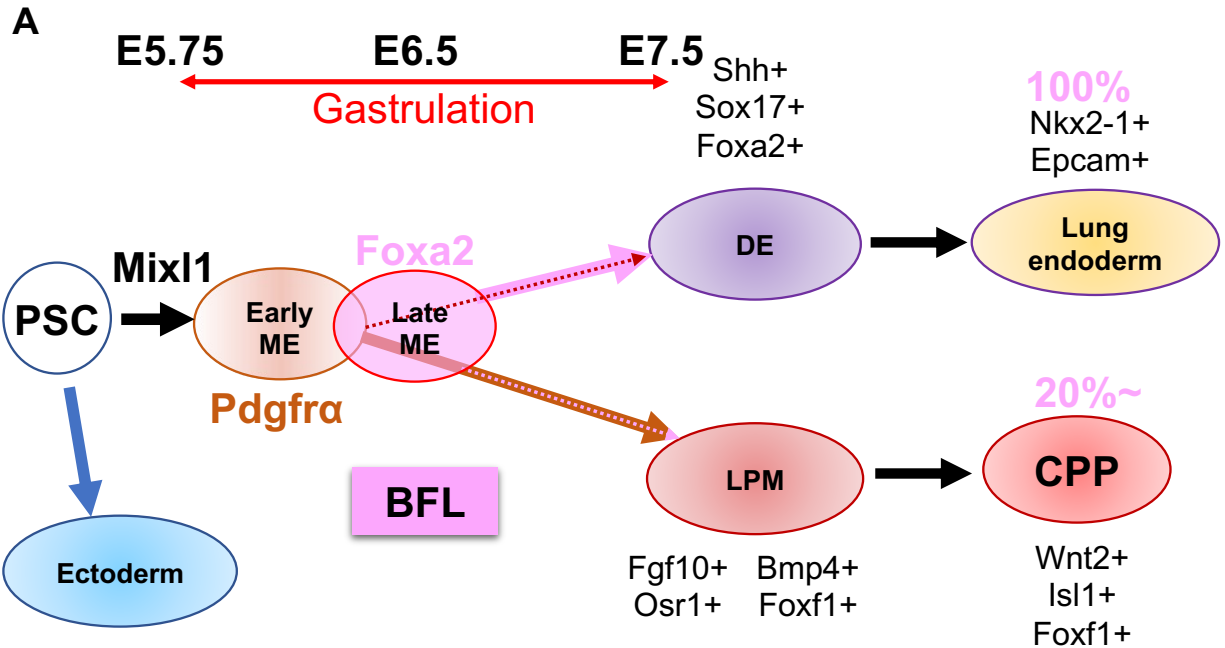

**ME\*: mesendoderm (primitive streak ~ nascent mesoderm)**

**Foxa2 lineage** ⇒ All lung epithelium & part of the lung mesenchyme

**Pdgrα lineage** ⇒ All lung mesenchyme & part of the lung epithelium

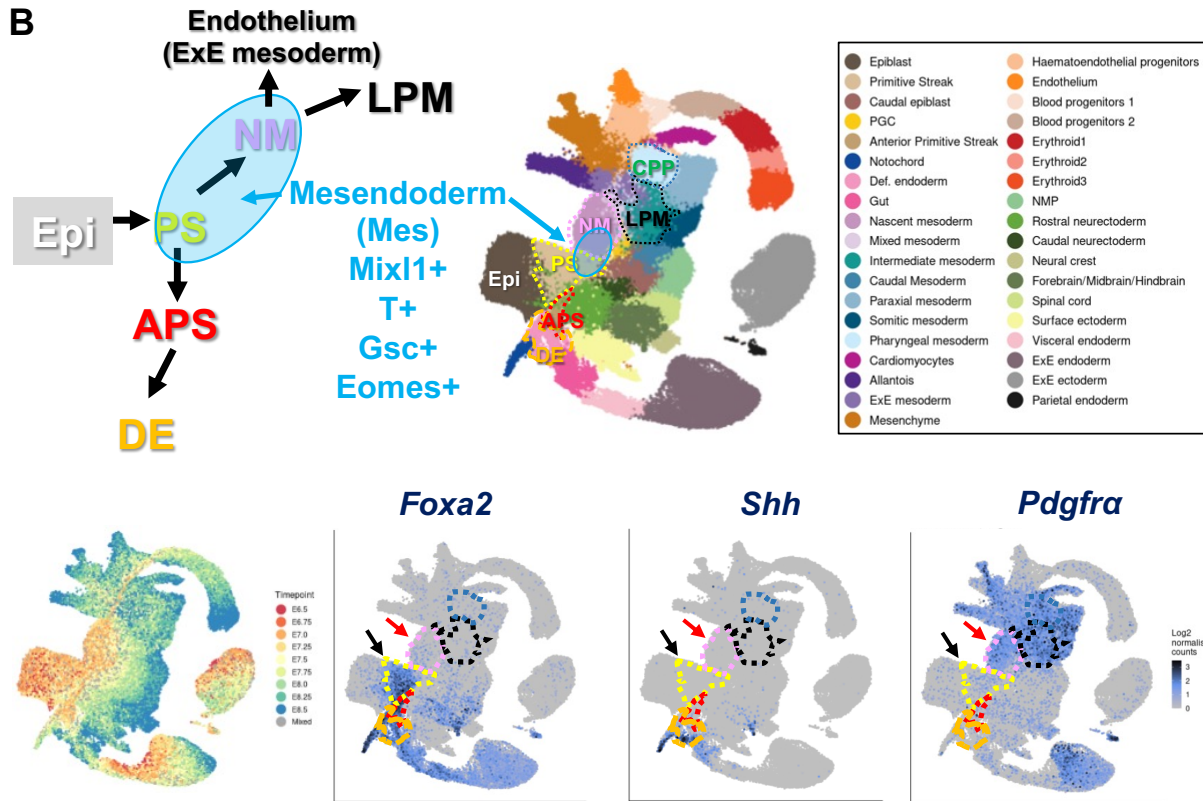

**Figure S4. Summary of the results and proposed models.** (A) Pluripotent stem cell (PSC) differentiation will be initiated by the *Mixl1*<sup>+</sup> induction and the subsequent temporal expression of an early mesendoderm (ME) marker, *Pdgfra*. After that, the late mesendoderm marker marked by *Foxa2* will turn on. *Pdgfra* and *Foxa2*-lineage partially overlap at the primitive streak stage during gastrulation. *Pdgfra*<sup>+</sup> early ME lineage gives rise to the partial lung epithelial cells, most likely by the overlapping *Foxa2*<sup>+</sup> lineage and entire lung mesenchyme through lateral plate mesoderm (LPM) induction and cardiopulmonary lineage (CPP). On the other hand, the *Foxa2*-lineage gives rise to the whole lung epithelium and about 20% of CPP in early lung development at E12.5~E14.5. Strikingly, the whole lungs, including lung epithelium, mesenchyme, and endothelial cells, were produced solely by donor iPSCs via complementing the *Foxa2*-lineage's mitotic defective lung niches. It proves that a *Foxa2*-lineage works as a bona fide lung generative lineage (BFL), enough to generate entire lungs by donor iPSCs via CBC. (B) Top left panel: Schematic diagram of mesendoderm lineage trajectory for lung formation based on the single cell RNA-seq (scRNA-seq) deposited database(Pijuan-Sala et al., 2019). During gastrulation, a bipotent mesendoderm (Mes: rounded blue area) appears in the transition from PS and NM, labeled by *Mixl1*, *T*, *Gsc*, and *Eomes*. NM forms lateral plate mesoderm (LPM). Mesendoderm also gives rise to anterior PS (APS) and, subsequently, definitive endoderm (DE). Top right panel: Clustering of scRNA-seq provided in the deposited database(Pijuan-Sala et al., 2019). Bottom left panel: Timepoint of scRNA-seq provided in the deposited database(Pijuan-Sala et al., 2019). bottom: *Foxa2* is expressed in the PS (black arrow) and the part of NM (red arrow). In contrast, *Shh* appeared in DE but not in PS, NM, or APS. A few cells showed *Pdgfra* in PS (black arrow) but most expressed *Pdgfra* in NM (red arrow) and LPM.

| Table. 1 E17.5 Chimerism of Foxa2 promoter-driven conditional blastocyst comple |                               |       |       |            |            |             |
|---------------------------------------------------------------------------------|-------------------------------|-------|-------|------------|------------|-------------|
|                                                                                 |                               |       |       |            |            |             |
|                                                                                 |                               | Liver | Lung  |            |            |             |
|                                                                                 |                               |       | Whole | Epithelium | Mesenchyme | Endothelium |
| <b>Foxa2-Cre</b>                                                                | <b>Fgfr2<sup>cnll</sup></b>   | 56.2  | 91.8  | 99.8       | 92.6       | 78.1        |
|                                                                                 |                               | 54.8  | 90.6  | 99.2       | 90         | 92.8        |
|                                                                                 |                               | 47.4  | 90.3  | 99.2       | 89.8       | 91.9        |
|                                                                                 |                               | 38.5  | 87.7  | 99.8       | 87.3       | 83.5        |
|                                                                                 |                               | 14    | 58.9  | 97.8       | 57.6       | 47.1        |
|                                                                                 | <b>Fgfr2<sup>hetero</sup></b> | 60.2  | 65.9  | 46.2       | 68.1       | 33.1        |
|                                                                                 |                               | 56.3  | 88.8  | 81.8       | 89.2       | 90.7        |
|                                                                                 |                               | 24.2  | 42.1  | 52.9       | 40         | 51.9        |
|                                                                                 |                               | 9.16  | 22.7  | 54.6       | 19.4       | 21.1        |
|                                                                                 |                               |       |       |            |            |             |
| <b>Shh-Cre</b>                                                                  | <b>Fgfr2<sup>cnll</sup></b>   | 35.7  | 73.6  | 99.2       | 71.7       | 73.9        |
|                                                                                 |                               | 13    | 79.2  | 99.8       | 76.5       | 77.8        |
|                                                                                 | <b>Fgfr2<sup>hetero</sup></b> | 57.4  | 83.1  | 99.3       | 79.6       | 86.6        |
|                                                                                 |                               | 44.4  | 84.3  | 99.2       | 83.4       | 78.7        |
|                                                                                 |                               | 13.8  | 35    | 59.2       | 33.8       | 27          |
|                                                                                 | <b>Wild type</b>              | 56    | 68.5  | 79.2       | 66.2       | 73.6        |
|                                                                                 |                               | 22.3  | 56.7  | 18         | 61.3       | 68.7        |
|                                                                                 |                               | 20.1  | 53.1  | 54.9       | 52.9       | 53.7        |
|                                                                                 |                               | 17    | 89.5  | 90.8       | 80.6       | 87.7        |
|                                                                                 |                               |       |       |            |            |             |
|                                                                                 |                               |       |       |            |            |             |
|                                                                                 |                               |       |       |            |            |             |

| Table. 2 E14.5 Chimerism of Foxa2 promoter-driven conditional blastocyst comple |                                      |       |       |            |            |             |
|---------------------------------------------------------------------------------|--------------------------------------|-------|-------|------------|------------|-------------|
|                                                                                 |                                      | Liver | Lung  |            |            |             |
|                                                                                 |                                      |       | Whole | Epithelium | Mesenchyme | Endothelium |
| <b>Foxa2-Cre</b>                                                                | <b><i>Fgfr2<sup>cnull</sup></i></b>  | 59.9  | 81.9  | 99.4       | 81.4       | 86.2        |
|                                                                                 |                                      | 51    | 75.4  | 99.4       | 75.4       | 56.8        |
|                                                                                 |                                      | 25.3  | 56.5  | 97.4       | 54.1       | 63.2        |
|                                                                                 | <b><i>Fgfr2<sup>hetero</sup></i></b> | 37.1  | 54.4  | 56.9       | 54         | 58.9        |
|                                                                                 |                                      | 29.8  | 48.6  | 83.3       | 47.7       | 47.3        |
|                                                                                 |                                      | 18.7  | 43.4  | 18         | 45         | 31          |
|                                                                                 |                                      | 0.54  | 0.24  | 0.91       | 0.1        | 2.11        |
|                                                                                 |                                      | 0.4   | 0.17  | 1.02       | 0.058      | 1.23        |
|                                                                                 | <b><i>Wild type</i></b>              | 39    | 68.7  | 56.2       | 69.2       | 67.5        |
|                                                                                 |                                      | 29.4  | 81.1  | 62.7       | 81.8       | 80.8        |
|                                                                                 |                                      | 28.6  | 73.9  | 39.6       | 75.6       | 76.4        |
|                                                                                 |                                      | 13.8  | 29.5  | 5.57       | 30.4       | 29.6        |
|                                                                                 |                                      | 0     | 2.22  | 5.52       | 1.5        | 16          |
